# Supplementary material for: Strengths and weaknesses of working with the Global Trigger Tool method for retrospective record review: focus group interviews with team members
Source: PubMed Central journal article supplement — BMJ Open. 2013 Sep 24;3(9):e003131. doi: 10.1136/bmjopen-2013-003131 (PMC3787413; doi:10.1136/bmjopen-2013-003131), 2013-09-24
Supplement: bmjopen-2013-003131.draft_revisions.pdf [file bmjopen-2013-003131.draft_revisions.pdf]

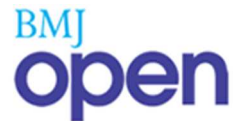

**Experiences of the Global Trigger Tool method for retrospective record review - Focus group interviews.**

|                                 |                                                                                                                                                                                                                                                                                                                                                                                                                                                                                                                                    |
|---------------------------------|------------------------------------------------------------------------------------------------------------------------------------------------------------------------------------------------------------------------------------------------------------------------------------------------------------------------------------------------------------------------------------------------------------------------------------------------------------------------------------------------------------------------------------|
| Journal:                        | <i>BMJ Open</i>                                                                                                                                                                                                                                                                                                                                                                                                                                                                                                                    |
| Manuscript ID:                  | bmjopen-2013-003131                                                                                                                                                                                                                                                                                                                                                                                                                                                                                                                |
| Article Type:                   | Research                                                                                                                                                                                                                                                                                                                                                                                                                                                                                                                           |
| Date Submitted by the Author:   | 26-Apr-2013                                                                                                                                                                                                                                                                                                                                                                                                                                                                                                                        |
| Complete List of Authors:       | Schildmeijer, Kristina; Faculty of Health and Life Sciences, Linnaeus University<br>Nilsson, Lena; Division of Drug Research, Anesthesiology and Intensive Care, Department of Medical and Health Sciences, Faculty of Health Sciences, Linköping University, Department of Anesthesia and Intensive Care<br>Perk, Joep; Faculty of Health and Life Sciences, University of Linneus<br>Nilsson, Gunilla; Faculty of Health and Life Sciences, Årestedt, Kristofer; Department of Medical and Health Sciences, Linköping University |
| <b>Primary Subject Heading</b>: | Qualitative research                                                                                                                                                                                                                                                                                                                                                                                                                                                                                                               |
| Secondary Subject Heading:      | Health services research                                                                                                                                                                                                                                                                                                                                                                                                                                                                                                           |
| Keywords:                       | Health & safety < HEALTH SERVICES ADMINISTRATION & MANAGEMENT, Quality in health care < HEALTH SERVICES ADMINISTRATION & MANAGEMENT, QUALITATIVE RESEARCH, Adverse events < THERAPEUTICS                                                                                                                                                                                                                                                                                                                                           |
|                                 |                                                                                                                                                                                                                                                                                                                                                                                                                                                                                                                                    |

SCHOLARONE™  
Manuscripts

**Title:** Experiences of the Global Trigger Tool method for retrospective record review - Focus group interviews.

Kristina Schildmeijer, RN, PhD student <sup>1</sup>

Lena Nilsson, MD, PhD <sup>2</sup>

Joep Perk, Professor<sup>1</sup>

Kristofer Årestedt, RN, PhD <sup>1,3,4</sup>

Gunilla Nilsson, RN, Assoc Prof <sup>1</sup>

- 1) School of Health and Caring Sciences, Faculty of Health and Life Sciences , Linnaeus University, S-391 82 Kalmar, Sweden
- 2) Division of Drug Research, Anesthesiology and Intensive Care, Department of Medical and Health Sciences. Department of Anesthesia and Intensive Care, County Council of Östergötland, S-581 85 Linköping, Sweden
- 3) Division of Nursing Science, Department of Medical and Health Sciences, Linköping University, S-581 83 Linköping, Sweden
- 4) Palliative Research Centre, Ersta Sköndal University College and Ersta hospital, S-100 61 Stockholm, Sweden

Correspondence to:

Kristina Schildmeijer

Tel +46-480-44 67 62

Fax + 46-480-44 60 32

E-mail address: [kristina.schildmeijer@lnu.se](mailto:kristina.schildmeijer@lnu.se)

**Keywords:** Global Trigger Tool, systematic record review, adverse events, patient safety, focus groups, experiences.

**Word count:** 3461 excluding title page, abstract, references, figures and tables

## ABSTRACT

**Objectives:** The aim was to describe experiences of working with the Global Trigger Tool method from team member perspectives.

**Design:** The study was conducted using a qualitative, descriptive approach with focus group interviews using content analysis.

**Setting:** Five Swedish hospitals in 2011.

**Participants:** Five Global Trigger Tool teams, with 5 physicians and 11 registered nurses.

**Intervention:** Five focus group interviews were carried out with the five teams. The opening question was; “What are your experiences of reviewing with the Global Trigger Tool?”

Interviews were taped and transcribed verbatim.

**Results:** Seven categories emerged relating to the strengths and weaknesses of the Global Trigger Tool method. Gradually, changes in the methodology were made by the teams, e.g. the teams reported how nurses divided up the charts into two sets, each being read respectively. The teams described the method as important and well-functioning. The most important, but also the most difficult, was the task of bringing the results back to the clinic. The teams found it easier to discuss findings at their own clinic.

**Conclusions:** Small, gradual methodological changes may lead to large differences over time. The GTT method should be seen preferably as a qualitative tool, strengthened by its adaptability to different specialties, and where reviewing medical records are to be performed locally.

## Article summary

### Article focus

The Global Trigger Tool (GTT) method has been criticized for being too subjective, and has been shown to differ in agreement between reviewer teams.

To improve medical record reviewing as a useful tool in patient safety work it is essential to gain a deeper understanding of reviewing teams' experiences of working with the GTT method.

The article focuses on the team members' experiences of the GTT method.

### Key messages

The GTT method is a useful, relevant and important tool in patient safety work.

The teams made changes in the review process over time.

GTT should be used preferably as a qualitative tool which can be adapted to various specialties or patient groups.

Being a GTT team member provides the participant with increased understanding of the healthcare system, as well as accountability for tracking and making improvements in healthcare.

The teams had discovered how working in an interdisciplinary way through the reviewing process could both provide a holistic view, and increase the quality of care.

### Strengths and limitations of the study

Experienced reviewers from different sized hospitals were interviewed. All team members took the opportunity to speak as a team.

1  
2  
3 The analysis was based on propositions from the five focus group teams. However, it was  
4  
5 difficult to say how well they reflected the opinions of the other teams. This should be  
6  
7 verified through further studies.  
8  
9  
10  
11  
12  
13  
14  
15  
16  
17  
18  
19  
20  
21  
22  
23  
24  
25  
26  
27  
28  
29  
30  
31  
32  
33  
34  
35  
36  
37  
38  
39  
40  
41  
42  
43  
44  
45  
46  
47  
48  
49  
50  
51  
52  
53  
54  
55  
56  
57  
58  
59  
60

## Background

Adverse events (AEs) are common in healthcare. European studies report a prevalence of patient harm of 9-12%. [1-6] Patient harm can be identified through retrospective patient record reviews. [5,7-9] The Global Trigger Tool (GTT), developed by the Institute for Health Care Improvement (IHI) [10-12], is one such method for identifying AEs conveying harm as experienced by patients, caused by medical treatment, not the underlying medical condition of the patient. GTT implies that medical records from hospital admissions are retrospectively reviewed by experienced teams consisting often of two registered nurses and one physician. The method has been used increasingly in patient safety work [1,13-18]. An advantage of the GTT is its ability to measure the rate of AEs over time within an organisation. In order to increase patient safety, the use of GTT for evaluating and measuring patient safety has been promoted in several countries. [19-23] The methodology of record reviews has been criticized for not being sufficiently robust, whereby judgments have been found to differ between reviewing teams. [24-27] Although inter-rater agreement between review teams is moderate [26-28], a Blant-Altman analysis of the GTT method showed large random errors when comparing review teams. [26] This reduces its ability to track a true change in patient safety levels.

In order to improve record review as a tool in patient safety work it is essential to gain a deeper understanding of reviewing teams' experience of the GTT method. This knowledge could provide us with a better understanding of the causes of disagreement between teams, and should provide valuable knowledge for refining the GTT.

## Objective

The aim was to describe experiences of working with the Global Trigger Tool method from team member perspectives.

## METHOD

The study was conducted using a qualitative, descriptive approach with focus group interviews as described and analyzed by Krueger and Krueger & Casey. [29-31]

### The Global Trigger Tool method

The GTT method is based on the study of retrospective structured medical record reviews in an effort to find “triggers”. [10,12] A “trigger” may indicate that an AE has occurred, e.g. the trigger “reoperation” indicating that an AE might have taken place at the first operation.

Teams consisting of one physician and two RNs review a patient’s medical records. In the first stage, the RNs review independently and note “triggers” on a chart. The time limit is set at 20 minutes. The nurses then discuss their findings, and after having reached a consensus, complete a new chart together. Charts with a potential AE are forwarded to the physician. In stage two, the physician determines if an AE has occurred and, if so, the level of harm. The Swedish GTT version is modified for Swedish conditions, listing 53 triggers rather than 54 as in the original GTT method. [11] It also contains an additional item referred to as “preventability”. Preventability is graded on a scale from 1-6, with 1 being no real evidence for preventability and 6 being completely secure evidence for preventability. Preventability is judged by the physicians. [5,19] (Table 1)

**Table 1.** Description of level of harm and preventability scale.

| <b>Level of harm</b>                                                                           |                                                                                                                                                                        |
|------------------------------------------------------------------------------------------------|------------------------------------------------------------------------------------------------------------------------------------------------------------------------|
| A                                                                                              | Circumstances or events that have the capacity to cause error                                                                                                          |
| B                                                                                              | An error occurred but did not reach the patient                                                                                                                        |
| C                                                                                              | An error occurred that reached the patient but did not cause patient harm                                                                                              |
| D                                                                                              | An error occurred that reached the patient and required monitoring to confirm that it resulted in no harm to the patient and/or required intervention to preclude harm |
| E                                                                                              | An error that contributed to or resulted in temporary harm to the patient and required intervention                                                                    |
| F                                                                                              | An error that contributed to or resulted in temporary harm to the patient and required initial or prolonged hospitalization                                            |
| G                                                                                              | An error that contributed to or resulted in permanent patient harm                                                                                                     |
| H                                                                                              | An error that required intervention necessary to sustain life                                                                                                          |
| I                                                                                              | An error that may have contributed to patient death                                                                                                                    |
| Only categories E-I are included in GTT, as GTT is designed to identify injury to the patient. |                                                                                                                                                                        |
| NCC MERP (National Coordinating Council for Medication Error Reporting and Prevention Index)   |                                                                                                                                                                        |
| <b>Preventability scale</b>                                                                    |                                                                                                                                                                        |
| 1                                                                                              | No real evidence for preventability                                                                                                                                    |
| 2                                                                                              | Weak to small evidence for preventability                                                                                                                              |
| 3                                                                                              | Preventability less likely than 50 percent, but close                                                                                                                  |
| 4                                                                                              | Preventability more probable than 50 percent, but close                                                                                                                |
| 5                                                                                              | Strong evidence for preventability                                                                                                                                     |
| 6                                                                                              | Completely secure evidence for preventability                                                                                                                          |
| Classes 1-3 are considered non preventable harm.                                               |                                                                                                                                                                        |
| Classes 4-6 are considered preventable harm. [5]                                               |                                                                                                                                                                        |

## Participants

Five focus groups participated in the study. Each included one GTT review team from each of the five different sized hospitals in the south eastern region of Sweden. The teams had participated in an earlier study comparing reviews of the same set of records. [27] The 16 participants in the focus groups consisted of five physicians and eleven RNs. All had long experience of working in health care, and 3-5 years' experience of reviewing medical record (Table 2). Participants from the teams were part of their hospital's patient safety teams, and worked extensively with patient safety issues. Four of the hospitals are middle-sized with about 200 beds, and one is a university hospital with approximately 600 beds. All hospitals used electronic medical records.



**Table 2.** Description of the teams.

| Team<br>GTT (years) | Profession | Age/Gender | Experiences of | Specialty              | Working with<br>profession (years) |
|---------------------|------------|------------|----------------|------------------------|------------------------------------|
| I                   | Physician  | 64 M       | 30             | Psychiatry             | 3                                  |
|                     | Nurse      | 60 F       | 39             | Midwife                | 4                                  |
|                     | Nurse      | 59 F       | 37             | Internal medicine care | 3                                  |
|                     | Nurse      | 63 F       | 30             | Psychiatric care       | 4                                  |
| II                  | Physician  | 54 F       | 30             | Anesthesiology         | 5                                  |
|                     | Nurse      | 39 F       | 19             | Intensive care         | 3                                  |
|                     | Nurse      | 38 F       | 18             | Intensive care         | 3                                  |
| III                 | Physician  | 64 M       | 37             | ENT (ear-nose-throat)  | 4                                  |
|                     | Nurse      | 44 F       | 18             | Emergency care         | 4                                  |
|                     | Nurse      | 63 F       | 39             | Orthopedic care        | 4                                  |
| IV                  | Physician  | 66 M       | 40             | Internal medicine      | 4                                  |
|                     | Nurse      | 53 F       | 27             | Internal medicine care | 4                                  |
|                     | Nurse      | 58 F       | 36             | Intensive care         | 4                                  |
| V                   | Physician  | 63 M       | 35             | Surgeon                | 4                                  |
|                     | Nurse      | 37 F       | 13             | Pediatric care         | 4                                  |
|                     | Nurse      | 58 F       | 34             | Midwife                | 4                                  |

### Data collection

The interviews took place between January and March of 2011 at the five hospitals where the participants worked. Five 80 to 95-minute focus group interviews were conducted. One of the authors (K.S.) moderated all the interviews, with an observer (G.N. or K.Å.). The moderator was responsible for facilitating the discussion and prompting team members to speak, while the observer recorded sessions and took notes. After an opening question, aimed to make the team members feel comfortable, an introductory question was asked: What are your experiences of the GTT method? The introductory question was followed by transition questions forming a link between the introductory and key questions. The key questions captured the major areas of concern. Toward the ends of the interviews researchers asked summarizing questions, e.g. if there was more to discuss, or if something needed clarification. All interviews were recorded and transcribed verbatim.

### Analysis of the interviews

Interviews were analysed according to Krueger and Casey to identify patterns and discover relationships between ideas. The transcripts were read and reread to become completely familiar with the data, and comprehend essential features. Data analysis proceeded simultaneously with data collection until no new information emerged. The text was coded and opinions with similar meanings were grouped into seven categories. Comparisons were made throughout the analysis between categories and the text as a whole. [31]

Conformability, credibility and dependability are all concepts of trustworthiness. [32] To validate the findings investigator triangulation was used. The first author (KS) conducted the analysis and established categories based on citations. To ensure conformability, co-authors discussed the categories. To increase credibility, five focus groups were conducted. A careful description of the sampling procedure and data analyses was presented to ensure dependability. Each citation was given a number for data-reporting purposes to show evidence of reporting across responses from the five teams (Team I – Team V).

### Ethical considerations

All members of the GTT teams gave their individual informed consent to participate in the study. Ethical permission was obtained from the Regional Ethical Board of Linköping University, Sweden (study number 2010/399-32).

## RESULTS

The categories found were; *“Usefulness and use of the GTT”, “Triggers”, “Preventability of harm”, “Team design”, “Team tasks”, “Team members’ knowledge development ” and “Documentation”*. Whereby both strengths and weaknesses were found in the categories each category was presented by its strengths and weaknesses. Although teams considered the GTT method too subjective at times, they also found it useful. Most important was considered the method’s capability of aiding reviewers in identifying signs of patient harm.

### *Usefulness and use of the GTT*

#### **Strengths**

Team members found the method useful in identifying patient harm. An advantage was that the method, apart from being used in a random selection of records, could also be used by specific specialties, or for a subgroup of patients, i.e. for deceased patients.

*“It is useful, relevant and important!” (II).*

Most often RNs could easily make their assessments within 20 minutes, pointing out the time limit as a strong point of the method.

*“You quickly find what you need” (I).*

While some RNs felt it better to review medical records outside their specialties, others found it much easier to examine records from their own speciality.

*“It is easier to understand why certain were done when you review your own area” (IV).*

#### **Weaknesses**

The teams gave careful reports on how they previously performed audits, and all mentioned that they used the method as described in the handbook. Still, all teams made changes in the review process. For example, in the manual it states that the two RNs in the team should

1  
2  
3 review the same records separately and then come to a consensus. Instead, all RN teams  
4 reported dividing the charts into two sets and reading them separately.  
5  
6

7 *“It is good to sit together and talk, but we no longer review the same records” (V).*  
8

9 The RNs sometimes thought it hard to restrict themselves to triggers when they found other  
10 striking things in patient records. This led them to use the method for purposes other than that  
11 originally intended. In such cases they chose to mark these findings on the GTT chart and  
12 discuss them with the team.  
13  
14  
15

16 *“When I find things that make me react I include them. They may be important in other*  
17 *contexts” (I).*  
18  
19

20 Even if all teams considered the method useful, they also mentioned that it was too physician-  
21 oriented. A nursing care perspective was missing and was requested.  
22  
23  
24

25 *“One wishes it was more care oriented...lack of care can also harm patients” (IV).*  
26  
27

28 All teams talked about the method’s weakness in not capturing all failures, as omission is not  
29 part of the GTT.  
30  
31  
32

33 *“There is no trigger for omission. One sometimes wonders why no one has reacted” (V).*  
34  
35

36 Even if the time limit was not considered a major problem, there were still situations when the  
37 time limit was a problem, e.g. where patients had experienced a long period of care. RNs  
38 mentioned that in some cases the time limit was sometimes exceeded.  
39  
40  
41

42 *“We read the records very carefully; and 20 minutes was in no way enough!” (IV).*  
43  
44

45 When reviewing records from their own area there was a risk for the RNs becoming jaded,  
46 regarding patient harm as something that just happens.  
47  
48

49 *“You are more forgiving in your own area” (III).*  
50  
51  
52  
53  
54  
55  
56  
57  
58  
59  
60

### Triggers

#### Strengths

The teams found the triggers' foreseeability intuitive, covering wide areas and facilitating reviewing.

*"The triggers are good and useful (I).*

#### Weaknesses

Even if all teams were satisfied with the GTT method, they found that some triggers were missed, and some never used.

*"The trigger "treatment" can always or never be used" (II).*

The team members' affiliations influenced to some extent their statements about missing triggers. All teams mentioned that a trigger for "failure or measures not been performed as intended" was missing. The teams also said that several nursing care triggers were missing and should be added.

*"Nutrition, elimination, pain and oral hygiene are all missing" (IV).*

One team mentioned that bad behaviour by health care providers was not brought up.

*"The method is not designed for assessing personnel behaviour from a patient perspective" (I).*

### Preventability of harm

#### Strengths

The teams mentioned that development and the work of patient safety required new thinking concerning what is preventable harm and what is not. They considered that GTT reviewing provided an opportunity to look at preventability from more than one perspective.

1  
2  
3 *“To achieve improvement you must consider many things as avoidable. It may be avoidable if*  
4 *things are done differently” (III).*

### 7 **Weaknesses**

8  
9  
10 When preventability came up for discussion all teams fully agreed that they considered the  
11 concept too subjective. They felt that there will be as many answers as the number of people  
12 asked.  
13

14  
15  
16 *“It’s not good, it’s too subjective” (I).*  
17  
18

### 19 *Team design*

### 22 **Strengths**

23  
24  
25 The teams found strength in their interdisciplinary representation of healthcare specialities.  
26  
27 For several personnel categories to consider patient care from different perspectives was  
28 considered a prerequisite for the implementation of healthcare improvements.  
29

30  
31  
32 *“Everyone’s efforts are necessary and important; we see things differently” (II).*  
33  
34  
35

### 36 **Weaknesses**

37  
38 A sufficient number of reviewers were considered important for avoiding problems in the  
39 event of reviewers dropping out. Too few reviewers led to team vulnerability due to the risk  
40 of team members being unavailable.  
41  
42

43  
44  
45 *“At least four reviewers are required” (I).*  
46

47 It was also important for team members to continue for long periods.

48  
49 *“You probably need, in any case, at least some years of experience” (IV).*  
50

51  
52 The team also saw a danger in staying too long, due to possible increasing tolerance toward  
53 AEs or substandard care. *“There is a risk of becoming less careful” (II).*  
54  
55  
56  
57  
58  
59  
60

### Tasks

#### Strengths

The interdisciplinary composition of the teams made it easier to take up reviewed events for discussion. Physicians discussed with other physicians, while nurses discussed with colleagues from their own departments.

*"After reviewing I discussed findings with my colleagues" (IV).*

#### Weaknesses

Teams sought intensified discussions to increase the work of quality improvement of patient safety. They agreed their most important task was to convey results back to their clinics. This was difficult when randomly reviewing records from an entire hospital.

*"Our ambition is to go to the clinics and tell them directly of our concerns for their specific problems" (I).*

Even if the teams would have liked to provide feedback to the clinics, they were concerned about how their findings would be received.

*"We do not want them to see us as police." (I).*

### Team member's knowledge development

#### Strengths

All teams had used the GTT on a monthly basis from three to five years for their hospital's patient safety work and were accustomed to reviewing patient records from the perspective of various medical specialities. Team members believed they had developed their skills gradually. They had also gained a greater understanding of the health care system during their time on the GTT team. They had increased their skills of how to and how not to document through the reading of patient records.

*"You learn a lot by reading others' notes" (IV).*

1  
2  
3 They also mentioned that they could better observe care and harm from the patient's  
4  
5 perspective.

6  
7 *"It (GTT) requires time to be able to go in and say that from the patient's perspective harm*  
8  
9 *has occurred" (II).*

## 10 11 12 13 **Documentation**

### 14 15 **Strengths**

16  
17 The teams considered nurses more exacting in their documentation than physicians, and it was  
18  
19 the nurses that revealed the greatest number of AEs and levels of harm. Nursing care  
20  
21 documentation was richer in its comments about the patients' conditions during hospital stay.

22  
23 *"Nurses' notes are much more accurate, concerning urinary infections and how the patient*  
24  
25 *really feels" (V).*

### 26 27 28 29 30 31 **Weaknesses**

32  
33 Although the teams felt they had identified patient harm through the nurses' documentation,  
34  
35 they considered documentation generally poor. They described sparse and duplicated  
36  
37 documentation.

38  
39 *"Medical record summaries are often written after the care episode and are very sparse" (V).*

40  
41 *"There is a considerable amount of duplicated documentation" (I).*

42  
43 The teams felt they had a lot to read, but that it had no real impact on patient care, which  
44  
45 influenced their overview of the patients' medical records. They also felt that minor incidents  
46  
47 during hospital stay, causing minor patient harm, were not mentioned in the epicrisis.

48  
49 *"Small incidents aren't mentioned at all" (V).*

50  
51 Sometimes it was hard for team members to understand how patient care had actually been  
52  
53 conducted, making review more difficult.



1  
2  
3 “You get no clear picture of the patient’s condition” (III).  
4

5 “One sometimes wonders how care has been carried out” (I).  
6  
7  
8

## 9 10 **DISCUSSION**

11 To the best of our knowledge, this study is the first investigation of how the GTT method is  
12 perceived and implemented. The teams found it useful, but mentioned that developing the  
13 necessary skills was time consuming. They had gradually modified the original review  
14 method to suit a personal context. The method was found subjective in some ways, especially  
15 in its estimation of preventability. A nursing care perspective was missed, and lack of  
16 documentation was a barrier to medical patient record reviewing.  
17  
18  
19  
20  
21  
22  
23  
24

25  
26  
27 The teams made small gradual changes in the methodology, which may have led to extensive  
28 differences in the assessments over time. They mentioned having used the method as  
29 described in the Swedish manual, [19], based on the original IHI method [11]. However,  
30 interviews revealed how teams used the method somewhat differently, occasionally for other  
31 purposes. For example, they reviewed records of all hospital deaths, specifically from  
32 intensive care, which led to clinical changes. Another example was how one team interpreted  
33 the presence of triggers as equal to the occurrence of harm. A recent Danish study showed  
34 that the method was initially interpreted differently at different hospitals [33] Kennerly et al.  
35 [34] described taking a more pragmatic approach to the GTT method choosing to make  
36 adjustments to retain as much safety information as possible, based on available resources.  
37  
38 Changes in methodology, along with perceived subjectivity in deciding what is an AE or not,  
39 as well as the assessment of preventability, could explain the considerable inter-rater  
40 disagreement between teams. From our point of view, the method should be considered  
41 primarily a qualitative method. Several studies have shown the superiority of record reviews  
42  
43  
44  
45  
46  
47  
48  
49  
50  
51  
52  
53  
54  
55  
56  
57  
58  
59  
60

1  
2  
3 in detecting and categorising AEs [1,3,14,15,18,35,36]. The GTT method can be adapted to  
4 specialties, subgroups of patients or health care processes. Safety problems can be identified  
5 by medical record review leading to specific safety measures to prevent future harm.  
6  
7  
8

9  
10  
11 Even if other things were perceived as important while examining patient records, team  
12 members considered the most important function of the GTT method was the identification of  
13 patient harm. In line with Brandrud [37] they developed new knowledge that proved to be  
14 very useful locally. Even if it was also considered important to provide feedback from GTT  
15 reviews to nurses and physicians on the wards, no team wanted to be regarded as controllers.  
16 They would rather look at harm on a systematic level as did Resar, [38] who mentioned that  
17 focus on harm targets the system rather than the individual, and can lead to the exploration of  
18 methodology to improve or enhance clinical outcomes.  
19  
20  
21  
22  
23  
24  
25  
26  
27  
28

29  
30  
31 The teams had many opinions about triggers that should be added or removed. They  
32 mentioned that the method included triggers never used, and triggers that could be used at all  
33 times, without necessarily identifying AEs. The teams missed nursing care triggers, such as  
34 patient pain, nutrition and elimination. They also saw a need for clinic-specific triggers. There  
35 are activity-specific trigger versions for ambulatory care, [16], intensive care [38], surgical  
36 care [39], neonatal care [36] and primary care [14]. Creating new triggers requires reflection.  
37 We agree with Kaafarani, [16], on the importance of considering clinical relevance, utility and  
38 feasibility of implementation when designing triggers.  
39  
40  
41  
42  
43  
44  
45  
46  
47  
48  
49

50  
51  
52 The teams found surprisingly insufficient documentation and mentioned this as a potential  
53 problem for becoming more proactive in patient safety work. As the GTT method is based  
54 solely on findings in patient records the teams highlighted the lack of documentation, causing  
55  
56  
57  
58  
59  
60

1  
2  
3 them to wonder how care had been conducted. This is in line with other studies. [40-42]  
4  
5 Weingart, [42] mentioned that many AEs are not recorded in the medical charts, attributable  
6  
7 to variable standards of documentation, clinical unawareness or oversight, and concern about  
8  
9 liability exposure. In our study team members mentioned finding it difficult to gain an  
10  
11 overview of the patient's illness. The same result has been shown by Stevenson and Nilsson.  
12  
13 [41] They found that essential information such as vital signs was difficult to enter and locate  
14  
15 in electronic records. It was also unclear where specific information such as blood pressure  
16  
17 and pulse should be documented.  
18  
19

20  
21  
22 The team members gained greater understanding of how healthcare worked, and also looked  
23  
24 upon AEs more from a patient perspective. This is in accordance with Brandrud [37] who  
25  
26 found three success factors for continuous quality improvement; continuous and reliable  
27  
28 information, involvement by all, and an infrastructure based on improvements in knowledge.  
29  
30 Being a GTT team member allows the participant new possibilities for collaboration, and a  
31  
32 better chance to be included in a patient safety context with accountability for tracking and  
33  
34 making changes in healthcare.  
35  
36  
37  
38  
39

40  
41 Our study has limitations that need to be considered. The team members had worked together  
42  
43 for several years. There is a risk they only stated what they believed to be old truths; but it  
44  
45 could also be an advantage whereby team members may have been able to share their  
46  
47 experiences more easily with people they know well. In our study experience was important,  
48  
49 which is why we did not select members from different teams and place them together in  
50  
51 focus groups. The analysis is based on propositions from the teams, but we do not know how  
52  
53 well they reflect "the real world". We hope that teams' statements open up new perspectives,  
54  
55  
56  
57  
58  
59  
60

1  
2  
3 communicating similarities. Other GTT teams will probably recognize similar experiences  
4  
5 and be able to refer to these findings, and hopefully develop their work of patient safety.  
6  
7

### 8 9 **Conclusions**

10 The GTT method was found useful but subjective. The teams gradually made small changes  
11  
12 in the methodology, which may have led to large differences between teams in the  
13  
14 assessments over time. The most important and difficult task as a review team was to report  
15  
16 AEs to the involved clinics. We conclude that the GTT method should be seen preferably as a  
17  
18 qualitative tool with the strength to be adapted to different specialties, where reviewing  
19  
20 should be performed.  
21  
22  
23  
24  
25

### 26 27 **Acknowledgements**

28 The authors wish to thank the teams for their efforts.  
29  
30  
31  
32

### 33 34 **Funding statement**

35 This work was supported by FORSS – the research council of southeast Sweden and the  
36  
37 County Council of Kalmar for KS. FORSS has neither been involved in any part of the study,  
38  
39 nor in writing the manuscript or in the decision to submit the manuscript for publication.  
40  
41  
42  
43  
44

### 45 46 **Competing interest**

47 None of the authors have competing interests.  
48  
49  
50

### 51 52 **Contributors**

53 Kristina Schildmeijer's responsibility; study design, acquisition of data, analysis,  
54  
55 interpretation of data, drafting the article and intellectual content.  
56  
57  
58  
59  
60

1  
2  
3 Lena Nilsson's responsibility; study design, drafting the article and intellectual content.

4  
5 Kristofer Årestedt's responsibility; study design, drafting the article and intellectual  
6  
7 content.

8  
9 Joep Perk's responsibility; study design, and intellectual content.

10  
11 Gunilla Nilsson's responsibility; study design, acquisition of data, analysis, interpretation  
12  
13 of data, drafting the article and intellectual content.

14  
15  
16  
17  
18 **Data sharing:**

19  
20 No additional data available  
21  
22  
23  
24  
25  
26  
27  
28  
29  
30  
31  
32  
33  
34  
35  
36  
37  
38  
39  
40  
41  
42  
43  
44  
45  
46  
47  
48  
49  
50  
51  
52  
53  
54  
55  
56  
57  
58  
59  
60

## REFERENCES

1. Classen D, Resar R, Griffin F, et al. "Global Trigger Tool" shows that adverse events in hospitals may be ten times greater than previously measured. *Health Affairs*. 2011;**30**(4):581-9.
2. Kohn LT. The Institute of Medicine report on medical error: Overview and implications for pharmacy. *Am J Health Syst Pharm*. 2001;**58**(1):63-6.
3. Landrigan C, Parry G, Bones C, et al. Temporal trends in rates of patient harm resulting from medical care. *N Eng J Med*. 2010;**363**(22):2124-34.
4. Schioler T, Lipczak H, Pedersen BL, et al. [Incidence of adverse events in hospitals. A retrospective study of medical records]. *Ugeskr Laeger*. 2001;**163**(39):5370-8.
5. Soop M, Fryksmark U, Koster M, et al. The incidence of adverse events in Swedish hospitals: a retrospective medical record review study. *Int J Qual Health Care*. 2009;**21**(4):285-91.
6. Vincent C, Neale G, Woloshynowych M. Adverse events in British hospitals: preliminary retrospective record review. *BMJ*. 2001;**322**(7285):517-9.
7. Sari A, Sheldon T, Cracknell A, et al. Extent, nature and consequences of adverse events: results of a retrospective casenote review in a large NHS hospital. *Qual Saf Health Care*. 2007;**16**(6):434-9.
8. Wilson R, Runciman W, Gibberd R, et al. The quality in Australian health care study. *Med J Aust*. 1995;**163**(9):458-71.
9. Unbeck M, Muren O, Lillkrona U. Identification of adverse events at an orthopedics department in Sweden. *Acta Orthop*. 2008;**79**(3):396-403.
10. Classen DC, Lloyd RC, Provost L, et al. Development and Evaluation of the Institute for Healthcare Improvement Global Trigger Tool. *J Patient Saf*. 2008;**4**(3):169.
11. Griffin F, Resar R. IHI Global Trigger Tool for measuring adverse events (Second Ed). Cambridge, Massachusetts: Institute for Healthcare Improvement, 2009.
12. Resar R, Rozich J, Classen D. Methodology and rationale for the measurement of harm with trigger tools. *Qual Saf Health Care*. 2003;**12 Suppl 2**:ii39-45.
13. Adler L, Denham C, McKeever M, et al. Global Trigger Tool: Implementation Basics. *J Patient Saf* 2008;**4**:245-9.

14. de Wet C, Bowie P. The preliminary development and testing of a global trigger tool to detect error and patient harm in primary-care records. *Postgrad Med J*. 2009;**85**(1002):176-80.
15. Good V, Saldana M, Gilder R, et al. Large-scale deployment of the Global Trigger Tool across a large hospital system: refinements for the characterisation of adverse events to support patient safety learning opportunities. *Qual Saf Health Care*. 2011;**20**(1):25-30.
16. Kaafarani H, Rosen A, Nebeker J, et al. Development of trigger tools for surveillance of adverse events in ambulatory surgery. *Qual Saf Health Care*. 2010;**19**(5):425-9.
17. Matlow AG, Cronin CM, Flintoft V, et al. Description of the development and validation of the Canadian Paediatric Trigger Tool. *BMJ Qual Saf*. 2011;**20**(5):416-23. Epub 2011/01/19.
18. Nilsson L, Pihl A, Tagsjo M, et al. Adverse events are common on the intensive care unit: results from a structured record review. *Acta Anaesthesiol Scand*. 2012;**56**(8):959-65. Epub 2012/05/11.
19. Institute for Healthcare Improvement. Structured record review to identify and measure the incidence of injuries in health care by the method described Global Trigger Tool: Guide to patient safety work [Swe: Strukturerad journalgranskning för att identifiera och mäta förekomst av skador i vården enligt metoden Global Trigger Tool : Handbok för patientsäkerhetsarbete]. Institute for Healthcare Improvement Innovation 2007 (A Swedish translated and adjusted version 2008). Stockholm: Kommentus; 2008.
20. The Danish safer hospital programme. Safety DsfP; 2012  
<http://www.sikkerpatient.dk/in-english/the-danish-safer-hospital-programme.aspx> [cited 18 March 2013]; (Second Ed.).
21. Canadian Patient Safety Institute; 2012  
<http://www.patientsafetyinstitute.ca/English/toolsresources/TriggerTools/Pages/default.aspx> [cited accessed 18 March 2013].
22. NMO H. In safe hands. Norwegian Knowledge Centre for the Health Services; 2012  
<http://www.pasientsikkerhetskampanjen.no/no/I+trygge+hender/In+English/In+Safe+Hands%3A+the+Norwegian+patient+safety+campaign+2011+-+2013.451.cms> [cited 2013 18 March ].
23. Patient safety first. Agency NPS; 2012  
<http://www.patientsafetyfirst.nhs.uk/Content.aspx?path=/About-the-campaign/> [cited 19 March 2013]; (Second Ed.).
24. Forster AJ, O'Rourke K, Shojania KG, et al. Combining ratings from multiple physician reviewers helped to overcome the uncertainty associated with adverse event classification. *J Clin Epidemiol*. 2007;**60**(9):892-901.

- 1  
2  
3 25. Hofer TP, Bernstein SJ, DeMonner S, et al. Discussion between reviewers does not improve  
4 reliability of peer review of hospital quality. *Med Care*. 2000;**38**(2):152-61.  
5  
6 26. Mattsson T, Lehmann, Knudsen J, et al. Assessment of the global trigger tool to measure,  
7 monitor and evaluate patient safety in cancer patients: reliability concerns are raised. *Qual and*  
8 *Saf in Health Care*. 2013;**0**:1-9.  
9  
10 27. Schildmeijer K, Nilsson L, Arestedt K, et al. Assessment of adverse events in medical care:  
11 lack of consistency between experienced teams using the Global Trigger Tool. *BMJ Qual Saf*.  
12 2012;**21**(4):307-14.  
13  
14 28. Sharek PJ, Parry G, Goldmann D, et al. Performance characteristics of a methodology to  
15 quantify adverse events over time in hospitalized patients. *Health Serv Res*. 2011;**46**(2):654-  
16 78.  
17  
18 29. Krueger RA. *Focus Groups- A practical guide for applied research*. (Second Ed.).  
19 Washington: Sage Publications, Inc.; 1994.  
20  
21 30. Krueger RA. *Analyzing & Reporting focus group results*. Washington: Sage Publications,  
22 Inc.; 1998.  
23  
24 31. Krueger RA, Casey MA. *Focus Groups - A Practical Guide for Applied Research*. (Fourth  
25 Ed.). Washington: SAGE; 2009.  
26  
27 32. Patton MQ. *Qualitative Research & Evaluation Methods* 3th edition ed. Washington: SAGE  
28 Publications Inc.; 2001.  
29  
30 33. von Plessen C, Kodal A, Anhoj J. Experiences with global trigger tool reviews in five Danish  
31 hospitals: an implementation study. *BMJ Open*. 2012;**2**:1-8.  
32  
33 34. Kennerly D, Saldana M, Kudyakov R, et al. Description and evaluation of adaption to the  
34 Global Trigger Tool to enhance value to adverse event reduction efforts. *J Patient Saf*.  
35 2013;**9**:1-9.  
36  
37 35. Rozich JD, Haraden CR, Resar RK. Adverse drug event trigger tool: a practical methodology  
38 for measuring medication related harm. *Qual Saf Health Care*. 2003;**12**(3):194-200.  
39  
40 36. Sharek P, Horbar J, Mason W, et al. Adverse events in the neonatal intensive care unit:  
41 development, testing, and findings of an NICU-focused trigger tool to identify harm in North  
42 American NICUs. *Pediatrics*. 2006;**118**(4):1332-40.  
43  
44 37. Brandrud A, Schreiner A, Hjortdahl P, et al. Three success factors for continual improvement  
45 in healthcare: an analysis of the reports of improvement team members. *BMJ Qual Saf*.  
46 2011;**20**(3):251-9.  
47  
48 38. Resar R, Rozich J, Simmonds T, et al. A trigger tool to identify adverse events in the  
49 intensive care unit. *Jt Comm J Qual Patient Saf*. 2006;**32**(10):585-90.  
50  
51 39. Griffin FA, Classen DC. Detection of adverse events in surgical patients using the Trigger  
52 Tool approach. *Qual Saf Health Care*. 2008;**17**(4):253-8.  
53  
54  
55  
56  
57  
58  
59  
60



- 1  
2  
3  
4 40. Cheevakasemsook A, Chapman Y, Francis K, et al. The study of nursing documentation  
5 complexities. *Int J Nurs Pract*. 2006;**12**(6):366-74.  
6  
7 41. Stevenson J, Nilsson G. Nurses' perceptions of an electronic patient record from a patient  
8 safety perspective: a qualitative study. *J Adv Nurs*. 2012;**68**(3):667-76.  
9  
10 42. Weingart S, Pagovich O, Sands D, et al. What can hospitalized patients tell us about adverse  
11 events? Learning from patient-reported incidents. *J Gen Intern Med*. 2005;**20**(9):830-6.  
12  
13  
14  
15  
16  
17  
18  
19  
20  
21  
22  
23  
24  
25  
26  
27  
28  
29  
30  
31  
32  
33  
34  
35  
36  
37  
38  
39  
40  
41  
42  
43  
44  
45  
46  
47  
48  
49  
50  
51  
52  
53  
54  
55  
56  
57  
58  
59  
60



**Strengths and weaknesses of working with the Global Trigger Tool method for retrospective record review - Focus group interviews with team members**

|                                 |                                                                                                                                                                                                                                                                                                                                                                                                                                                                                                                                    |
|---------------------------------|------------------------------------------------------------------------------------------------------------------------------------------------------------------------------------------------------------------------------------------------------------------------------------------------------------------------------------------------------------------------------------------------------------------------------------------------------------------------------------------------------------------------------------|
| Journal:                        | <i>BMJ Open</i>                                                                                                                                                                                                                                                                                                                                                                                                                                                                                                                    |
| Manuscript ID:                  | bmjopen-2013-003131.R1                                                                                                                                                                                                                                                                                                                                                                                                                                                                                                             |
| Article Type:                   | Research                                                                                                                                                                                                                                                                                                                                                                                                                                                                                                                           |
| Date Submitted by the Author:   | 26-Jun-2013                                                                                                                                                                                                                                                                                                                                                                                                                                                                                                                        |
| Complete List of Authors:       | Schildmeijer, Kristina; Faculty of Health and Life Sciences, Linnaeus University<br>Nilsson, Lena; Division of Drug Research, Anesthesiology and Intensive Care, Department of Medical and Health Sciences, Faculty of Health Sciences, Linköping University, Department of Anesthesia and Intensive Care<br>Perk, Joep; Faculty of Health and Life Sciences, University of Linneus<br>Nilsson, Gunilla; Faculty of Health and Life Sciences, Årestedt, Kristofer; Department of Medical and Health Sciences, Linköping University |
| <b>Primary Subject Heading</b>: | Qualitative research                                                                                                                                                                                                                                                                                                                                                                                                                                                                                                               |
| Secondary Subject Heading:      | Health services research, Evidence based practice                                                                                                                                                                                                                                                                                                                                                                                                                                                                                  |
| Keywords:                       | Health & safety < HEALTH SERVICES ADMINISTRATION & MANAGEMENT, Quality in health care < HEALTH SERVICES ADMINISTRATION & MANAGEMENT, QUALITATIVE RESEARCH, Adverse events < THERAPEUTICS                                                                                                                                                                                                                                                                                                                                           |
|                                 |                                                                                                                                                                                                                                                                                                                                                                                                                                                                                                                                    |

**Title:** Strengths and weaknesses of working with the Global Trigger Tool method for retrospective record review - Focus group interviews with team members

Kristina Schildmeijer, RN, PhD student<sup>1</sup>

Lena Nilsson, MD, PhD<sup>2</sup>

Joep Perk, Professor<sup>1</sup>

Kristofer Årestedt, RN, PhD<sup>1,3,4</sup>

Gunilla Nilsson, RN, Assoc Prof<sup>1</sup>

- 1) School of Health and Caring Sciences, Faculty of Health and Life Sciences, Linnaeus University, S-391 82 Kalmar, Sweden
- 2) Department of Medicine and Health Sciences, Linköping University, Department of Anesthesia and Intensive Care, County Council of Östergötland, S-581 85 Linköping, Sweden
- 3) Division of Nursing Science, Department of Medical and Health Sciences, Linköping University, S-581 83 Linköping, Sweden
- 4) Palliative Research Centre, Ersta Sköndal University College and Ersta hospital, S-100 61 Stockholm, Sweden

Correspondence to:

Kristina Schildmeijer

Tel +46-480-44 67 62

Fax + 46-480-44 60 32

E-mail address: [kristina.schildmeijer@lnu.se](mailto:kristina.schildmeijer@lnu.se)

**Keywords:** Global Trigger Tool, record review, adverse events, patient safety, focus groups.

**Word count:** 4213 words excluding title page, abstract, references, figures and tables

## ABSTRACT

**Objectives:** The aim was to describe the strengths and weaknesses, from team member perspectives, of working with the Global Trigger Tool method of retrospective record review to identify adverse events causing patient harm.

**Design:** A qualitative, descriptive approach with focus group interviews using content analysis.

**Setting:** Five Swedish hospitals in 2011.

**Participants:** Five Global Trigger Tool teams, with 5 physicians and 11 registered nurses.

**Intervention:** Five focus group interviews were carried out with the five teams. Interviews were taped and transcribed verbatim.

**Results:** Seven categories emerged relating to the strengths and weaknesses of the Global Trigger Tool method. The categories found were; *“Usefulness and use of the GTT”*, *“Triggers”*, *“Preventability of harm”*, *“Team composition”*, *“Team tasks”*, *“Team members’ knowledge development ”* and *“Documentation”*. Gradually, changes in the methodology were made by the teams, e.g. the teams reported how nurses divided up the charts into two sets, each being read respectively. The teams described the method as important and well-functioning. The most important, but also the most difficult, was the task of bringing the results back to the clinic. The teams found it easier to discuss findings at their own clinics.

**Conclusions:** The GTT method functions well for identifying adverse events and is strengthened by its adaptability to different specialties. However, small, gradual methodological changes together with continually developed expertise and adaption to looking at harm from a patient perspective may contribute to large differences in assessment over time.

ARTICLE SUMMA

## Article summary

### Article focus

The Global Trigger Tool (GTT) method for retrospective record review is a valuable tool for identifying adverse events causing patient harm, but has been criticized for subjectivity due to its being based upon the personal judgment of team members.

To improve record reviewing as a useful tool in patient safety work it is essential to gain a deeper understanding of the reviewing teams' experiences of working with the GTT method. The article focuses on strengths and weaknesses from a team member perspective of working with the GTT method.

### Key messages

The GTT method is a useful, relevant and important tool in patient safety work.

The teams made changes in the review process over time.

GTT can be adapted to various specialties or patient groups (e.g. patients in intensive care).

Being a GTT team member provides participant with an increased understanding of the healthcare system, as well as accountability for tracking and making improvements in healthcare.

### Strengths and limitations of the study

Experienced reviewers from different sized hospitals were interviewed. All team members took the opportunity to speak as a team.

The analysis was based on propositions from the five focus group teams. However, it was not clear whether their experiences of working with the GTT method reflected the opinions of teams from other hospitals. This needs to be verified through further studies.

## Background

Adverse events (AEs) are common in healthcare. European studies report a prevalence of patient harm of 9-12%. [1-4] AEs causing patient harm can be identified through retrospective patient record reviews. [3,5] The Global Trigger Tool (GTT), developed by the Institute for Healthcare Improvement (IHI), [6] is one such increasingly used method. [7,8] It identifies AEs causing harm as experienced by patients, caused by medical treatment, not the underlying medical condition of the patient. In GTT 20 medical records from randomly chosen hospital admissions are retrospectively reviewed every month by experienced teams often consisting of two registered nurses and one physician. An advantage of the GTT is the measurement of the rate of AEs over time within an organisation, and the use of GTT for evaluating and measuring patient safety has been promoted in several countries. [9-13] GTT has been shown superior to other incident-reporting systems in identifying AEs. [7,14] On the other hand, the methodology of record reviews, including GTT, has been criticized for not being sufficiently robust, whereby judgments have been found to differ between reviewing teams. [15-18] At moderate inter-rater agreement between review teams, [17-19] a Blant-Altman analysis of the GTT method showed large random errors when comparing review teams. [17] This reduces its ability to track a true change in the level of patient harm.

In order to gain a nuanced view of record review as a tool for evaluating patient safety work, we find it important to gain a deeper understanding of the experiences from reviewing teams working with the GTT method. This knowledge could provide us with a better understanding of the strengths and weaknesses of the GTT method, which might help us to better understand causes of disagreement between teams, and provide valuable knowledge for a broader view of the GTT method and its role in patient safety work.

## Objective

The aim was to describe strengths and weaknesses, from the perspective of team members working with the Global Trigger Tool method.

## METHOD

The study was conducted using a qualitative, descriptive approach with focus group interviews as described and analyzed by Krueger & Casey.[20]

### The Global Trigger Tool method

The GTT method is based on reviewing medical records from randomly selected admissions in a structured way in an effort to identify AEs by searching for “triggers”. It is designed for utilizing small samples over time.[21,22] A “trigger” may indicate that an AE has occurred, e.g. the trigger “reoperation” indicates that an AE may have taken place at the first operation. Teams consisting of one physician and two RNs review a patient’s medical records. In the first stage, the RNs review independently noting “triggers” and associated AEs on a chart. The time limit is set at 20 minutes. The nurses then discuss their findings, and after having reached a consensus, complete a new chart together. Charts with a potential AE are forwarded to the physician. In stage two, the physician determines if an AE has occurred and, if so, the level of harm. The Swedish GTT version is modified for Swedish conditions, listing 53 triggers rather than 54 as in the original GTT method.[6] It also contains an additional item referred to as “preventability”. Preventability is graded on a scale from 1-6, with 1 being no real evidence for preventability and 6 being completely secure evidence for preventability. Preventability for each AE is judged by the physicians.[3,9] (Table 1)

**Table 1.** Description of preventability scale.

| Preventability scale |                                                         |
|----------------------|---------------------------------------------------------|
| 1                    | No real evidence for preventability                     |
| 2                    | Weak to small evidence for preventability               |
| 3                    | Preventability less likely than 50 percent, but close   |
| 4                    | Preventability more probable than 50 percent, but close |
| 5                    | Strong evidence for preventability                      |
| 6                    | Completely secure evidence for preventability           |

Classes 1-3 are considered non preventable harm.  
Classes 4-6 are considered preventable harm.[3]

## Participants

Five focus groups participated in the study. Each included one GTT review team from each of the five different sized hospitals in south-eastern Sweden. The teams had participated in an earlier study comparing reviews of the same set of records.[18] Team members were contacted by email requesting participation in focus group interviews concerning their experiences of using the GTT. All team members agreed to participate in the interviews. The 16 participants consisted of five physicians and eleven RNs. All had long experience of working in health care, and 3-5 years' experience of reviewing medical record (Table 2). Participants from the teams were part of their hospital's patient safety teams, and worked extensively with patient safety issues including the GTT on a hospital-wide level. Eleven of the 16 team members were educated in GTT reviewing by attending a one-day program and partaking yearly in a two-day regional meeting devoted to training and collaboration. The other five team members had been trained by their respective colleagues. Four of the hospitals are middle-sized with about 200 beds, and one is a university hospital with approximately 600 beds. All hospitals used electronic medical records.



**Table 2.** Team member characteristics.

| Team | Profession | Age/Gender | Experiences of Specialty (years) | Profession             | Working with GTT (years) | Formal education in GTT |
|------|------------|------------|----------------------------------|------------------------|--------------------------|-------------------------|
| I    | Physician  | 64M        | 30                               | Psychiatry             | 3                        | No                      |
|      | Nurse      | 60F        | 39                               | Midwife                | 4                        | Yes                     |
|      | Nurse      | 59F        | 37                               | Internal medicine care | 3                        | No                      |
|      | Nurse      | 63F        | 30                               | Psychiatric care       | 4                        | Yes                     |
| II   | Physician  | 54F        | 30                               | Anesthesiology         | 5                        | Yes                     |
|      | Nurse      | 39F        | 19                               | Intensive care         | 3                        | No                      |
|      | Nurse      | 38F        | 18                               | Intensive care         | 3                        | No                      |
| III  | Physician  | 64M        | 37                               | ENT (ear-nose-throat)  | 4                        | Yes                     |
|      | Nurse      | 44F        | 18                               | Emergency care         | 4                        | Yes                     |
|      | Nurse      | 63F        | 39                               | Orthopedic care        | 4                        | Yes                     |
| IV   | Physician  | 66M        | 40                               | Internal medicine      | 4                        | No                      |
|      | Nurse      | 53F        | 27                               | Internal medicine care | 4                        | Yes                     |
|      | Nurse      | 58F        | 36                               | Intensive care         | 4                        | Yes                     |
| V    | Physician  | 63M        | 35                               | Surgeon                | 4                        | Yes                     |
|      | Nurse      | 37F        | 13                               | Pediatric care         | 4                        | Yes                     |
|      | Nurse      | 58F        | 34                               | Midwife                | 4                        | Yes                     |

### Data collection

The interviews took place between January and March of 2011 at the five hospitals where the participants worked. Five 80 to 95-minute focus group interviews were conducted. One of the authors (K.S.) moderated all interviews, with an assistant moderator (G.N. or K.Å.). The moderator was responsible for facilitating the discussion and prompting team members to speak, while the observer recorded sessions and took notes. K.S. had worked with the GTT method for four years on a hospital level, while G.N. and K.Å. had experience of working with qualitative studies and focus groups. Besides taking notes they were to also ensure that the moderator's pre-understanding did not affect team members' responses. After an opening question, aimed to make team members feel comfortable, an introductory question was asked:

1  
2  
3 What are your experiences of the strengths and weaknesses of the GTT method? The  
4 introductory question was followed by transition questions; “Tell us how it was when you  
5 started reviewing by using the GTT” and “How you are presently reviewing?” The purpose of  
6 transition questions was to form a link between the introductory and key questions. The key  
7 questions captured the major areas of concern. Examples of key questions were; “From your  
8 experiences, which strengths/weaknesses do you find with the method in its entirety?” “What  
9 are your experiences of the different triggers?” and “What is your opinion on the judgement  
10 of preventability?” During the interviews, the moderator asked probing questions, e.g. “What  
11 do you mean?” or “Can you explain a little further?” Towards the ends of the interviews the  
12 moderator asked questions, e.g. if there was more to discuss, or if something needed further  
13 clarification. The moderator also summarized the key points. All interviews were recorded  
14 and transcribed verbatim. Immediately after the focus group interviews, the moderator and the  
15 assistant moderator gave a debriefing of their first impressions and compared these  
16 interpretations from those found in earlier focus groups. The transcribed interviews were  
17 returned to the team members with the question of whether they felt that the text reflected  
18 their interviews. All accepted the text.  
19  
20  
21  
22  
23  
24  
25  
26  
27  
28  
29  
30  
31  
32  
33  
34  
35  
36  
37  
38  
39  
40

### 41 **Analysis of the interviews**

42 Interviews were analysed according to Krueger and Casey to identify patterns and discover  
43 relationships between ideas. Data analysis proceeded simultaneously with data collection until  
44 no new information emerged. The text was coded and opinions with similar meanings were  
45 grouped together until seven categories emerged. Comparisons were made throughout the  
46 analysis between categories and the text as a whole.[20]  
47  
48  
49  
50  
51  
52  
53  
54  
55  
56  
57  
58  
59  
60

1  
2  
3 Conformability, credibility and dependability are all concepts of trustworthiness.[23] To  
4  
5 validate the findings investigator triangulation was used. Transcripts were read and reread by  
6  
7 all researchers to gain a sense of content, sometimes returning to interview recordings to  
8  
9 become completely familiar with the data and comprehend its essential features. With the aim  
10  
11 of the study in mind researchers read the text and made notes and headings in the margins to  
12  
13 include all aspects of the content. The first author (KS) established categories based on  
14  
15 citations. To ensure conformability, co-authors discussed the categories, and changes were  
16  
17 made until consensus was reached. To increase credibility according to Krueger and  
18  
19 Casey,[20] at least three focus group interviews should be carried out. In this study, five focus  
20  
21 groups were conducted. A careful description of the sampling procedure and data analyses  
22  
23 was presented to ensure dependability. Each citation was given a number for data-reporting  
24  
25 purposes to show evidence of reporting across responses from the five teams (Team I – Team  
26  
27 V).  
28  
29  
30  
31  
32

### 33 **Ethical considerations**

34  
35 All members of the GTT teams gave their individual informed consent to participate in the  
36  
37 study. Ethical permission was obtained from the Regional Ethical Board of Linköping  
38  
39 University, Sweden (study number 2010/399-32).  
40  
41  
42  
43  
44  
45  
46  
47  
48  
49  
50  
51  
52  
53  
54  
55  
56  
57  
58  
59  
60

## RESULTS

The categories identified were; *“Usefulness and use of the GTT”, “Triggers”, “Preventability of harm”, “Team design”, “Team tasks”, “Team members’ knowledge development ” and “Documentation”*. Each category is presented by its strengths and weaknesses.

### *Usefulness and use of the GTT*

#### **Strengths**

Team members found the method useful in identifying patient harm. An advantage was that the method, apart from being used in a random selection of records, could also be used by specific specialties, or for a subgroup of patients, i.e. for deceased patients.

*“It is a useful tool; it is relevant and it identifies harm. I feel that it is important. It feels that the tool can positively affect healthcare...” (II).*

Most often RNs could easily make their assessments within 20 minutes, pointing out the time limit as a strong point of the method.

*“You quickly find what you need when you have figured out how to review” (I).*

While some RNs felt it better to review medical records outside their specialties, others found it easier to examine records from their own speciality.

*“It is easier to understand why certain things were done when you review your own area” (IV).*

#### **Weaknesses**

The teams gave careful reports on how they previously performed audits, and all mentioned that they used the method as described in the handbook. Still, all teams made changes in the review process. For example, in the manual it states that the two RNs in the team should

1  
2  
3 review the same records separately and then reach a consensus. Instead, all RN teams reported  
4  
5 dividing the charts into two sets and reading them separately.  
6

7 *“It is good to sit together and talk, but we no longer review the same records” (V).*  
8

9 The RNs sometimes thought it hard to restrict themselves to looking only for triggers and  
10 associated possible harm as indicated in the chart, when they found other striking things in  
11 patient records. This led them to use the method for purposes other than those originally  
12 intended. In such cases they chose to mark these findings on the GTT chart and discuss them  
13 with the team.  
14  
15  
16  
17  
18  
19

20 *“When I find things that make me react I include them. They may be important in other*  
21 *contexts” (I).*  
22  
23

24 Even if all teams considered the method useful, they also mentioned that it was oriented  
25 mainly towards harm connected to actions undertaken by physicians. A nursing care  
26 perspective was missing and was requested.  
27  
28  
29  
30

31 *“One wishes it (the GTT) was more care oriented...lack of care can also harm patients” (IV).*  
32  
33

34 All teams talked about the method’s weakness in not capturing all failures, as omission is not  
35 part of the GTT.  
36  
37

38 *“There is no trigger for omission. When reading notes, one sometimes wonders why no one*  
39 *has reacted” (V).*  
40  
41

42 Even if the time limit was not considered a major problem, there were still situations when the  
43 time limit was a problem, e.g. where patients had experienced a long period of care. RNs  
44 mentioned that in some cases the time limit was exceeded.  
45  
46  
47  
48

49 *“We read the records very carefully; and 20 minutes was in no way enough!” (IV).*  
50  
51

52 When reviewing records from their own area there was a risk for the RNs becoming  
53 insensible, regarding patient harm as something that just happens.  
54  
55  
56  
57  
58  
59  
60

1  
2  
3 “You are more forgiving in your own area, you become blind. Therefore, it is good that  
4 reviewers are from different clinics” (III).  
5  
6  
7

### 8 9 **Triggers**

#### 10 **Strengths**

11  
12 The teams found the triggers’ intuitive in a sense that they were easy to keep in mind covering  
13 wide areas and facilitating reviewing.  
14  
15

16  
17 “The triggers are good and useful (I).  
18  
19

#### 20 **Weaknesses**

21  
22 Even if all teams were satisfied with the GTT method, they found that some triggers were  
23 imprecise, and some never used.  
24  
25

26  
27 “The trigger “treatment” is vague and can always or never be used” (II).  
28  
29

30 The team members’ affiliations influenced to some extent their statements about a need for  
31 additional triggers. All teams mentioned that a trigger for “failure or measures not been  
32 performed as intended” was missing. The teams also said that several nursing care triggers  
33 were missing and should be added.  
34  
35

36  
37 “Triggers evaluating harm in the areas of nutrition, elimination, pain and oral hygiene are  
38 all missing” (IV).  
39  
40

41  
42 One team mentioned that bad behaviour by health care providers was not brought up.  
43  
44

45  
46 “The method is not designed for assessing personnel behaviour from a patient perspective”  
47 (I).  
48  
49

### 50 **Preventability of harm**

#### 51 **Strengths**

52  
53  
54  
55  
56  
57  
58  
59  
60

1  
2  
3 The teams mentioned that development of health care processes and the work of patient safety  
4 required new thinking and that the, for Swedish conditions added “judgment of  
5 preventability”, helped them in achieving this view. The question “Could this have been done  
6 differently?” in the sentence “Could we have prevented this from happening?” provided an  
7 opportunity to consider preventability from more than one perspective.  
8

9  
10  
11  
12  
13  
14 *“To gain improvement you must consider many findings as avoidable. It may be avoidable if*  
15 *things are done differently” (III).*  
16

### 17 18 **Weaknesses**

19  
20 When “judgment of preventability” came up for discussion, all teams considered the concept  
21 as too subjective. They felt there would be as many answers as the number of people asked.  
22

23  
24  
25 *“Determining harm to the patient is easy but the judgment of preventability is difficult” (I).*  
26  
27

### 28 29 **Team composition**

#### 30 31 **Strengths**

32  
33 The teams found strength in their interdisciplinary representation of healthcare specialities.

34  
35 Several personnel categories to consider patient care from different perspectives were  
36 considered a prerequisite for the implementation of healthcare improvements.  
37

38  
39  
40  
41 *“To gain good results, everyone’s efforts are necessary and important; we see things*  
42 *differently” (II).*  
43

#### 44 45 **Weaknesses**

46  
47 A sufficient number of reviewers were considered important for avoiding problems in the  
48 event of reviewers dropping out. Too few reviewers led to team vulnerability due to the risk  
49 of team members being unavailable.  
50

51  
52  
53  
54 *“At least four reviewers are required” (I).*  
55

56  
57 It was also important for team members to continue reviewing for long periods of time.  
58  
59  
60

1  
2  
3 *“You probably need, in any case, at least some years’ of experience of reviewing” (IV).*

4  
5 However, the team also saw a danger in remaining too long as a reviewer, due to possible  
6  
7 increasing tolerance toward AEs or substandard care.

8  
9 *“What I`m wondering about is that there is a risk of becoming less careful, to put things aside*  
10 *thinking that this is nothing“ (II).*

### 14 15 16 **Tasks**

#### 17 18 **Strengths**

19  
20 The interdisciplinary composition of the teams made it easier to take up reviewed events for  
21  
22 discussion, not only within the team but also with others. Physicians discussed with other  
23  
24 physicians, while nurses discussed with colleagues from their own departments.

25  
26 *”After reviewing I discussed findings with my colleagues” (IV).*

#### 27 28 **Weaknesses**

29  
30 Teams sought intensified discussions to increase the work of quality improvement of patient  
31  
32 safety. They agreed their most important task was to convey results back to their clinics. This  
33  
34 was difficult when randomly reviewing records from an entire hospital.

35  
36 *“Our ambition is to go to the different clinics and tell them directly of our concerns for their*  
37 *specific problems” (I).*

38  
39 Even if the teams would have liked to provide feedback to the clinics, they were concerned  
40  
41 about how their findings would be received.

42  
43 *“We do not want them to look at us as police officers, but wish to review and return to the*  
44 *clinics with our findings with the aim of improving things” (I).*

### 45 46 47 **Team member’s knowledge development**

#### 48 49 **Strengths**



1  
2  
3 All teams had used the GTT on a monthly basis from three to five years for their hospital's  
4 patient safety work and were accustomed to reviewing patient records from the perspective of  
5 various medical specialities. Team members believed they had developed their skills  
6 gradually. They had also gained a greater understanding of the health care system during their  
7 time on the GTT team. They had increased their skills of how to and how not to document  
8 through the reading of patient records.

9  
10  
11  
12  
13  
14  
15  
16 *"You learn a lot by reading others' notes on how to better carry out documentation" (IV).*

17 They also mentioned they could better observe care and harm from the patient's perspective.

18  
19  
20  
21 *"It (GTT) requires time to be able to say that from the patient's perspective harm has  
22 occurred" (II).*

## 23 24 25 26 27 **Documentation**

### 28 29 **Strengths**

30  
31 The teams considered nurses more accurate and precise in their documentation than  
32 physicians; and it was the nurse's notes that revealed the greatest number of AEs and helped  
33 the most to determine levels of harm. Nursing care documentation was richer in its comments  
34 about the patients' conditions during hospital stay.

35  
36  
37  
38  
39  
40  
41 *"Nurses' notes are much more detailed, concerning, for example, urinary infections and how  
42 the patient really feels" (V).*

### 43 44 45 **Weaknesses**

46  
47 Although the teams felt they had identified patient harm through the nurses' documentation,  
48 they considered documentation generally poor. They described sparse and duplicated  
49 documentation. The teams mentioned that minor incidents during hospital stay, causing minor  
50 patient harm, were not mentioned at all in the discharge letter.

51  
52  
53  
54  
55  
56  
57 *"There is a considerable amount of duplicated documentation" (I).*

1  
2  
3 *“Medical records summaries are often written after the care episode and are very sparse,*  
4 *small incidents aren’t mentioned at all” (V).*  
5  
6

7 The teams felt they had to look through a large body of text that sometimes made it difficult  
8 to orient themselves in the patients’ medical records. They also felt that some of the notes had  
9 no real impact on patient care, which influenced their overview of the patients’ medical  
10 records. Sometimes it was hard for team members to understand how patient care had actually  
11 been conducted, making review more difficult.  
12  
13

14 *“There is so much text that it becomes unmanageable, you get no clear picture of the patient’s*  
15 *condition” (III).*  
16  
17

18 *“One sometimes wonders how care has been carried out” (I).*  
19  
20  
21  
22

## 23 **DISCUSSION**

24 To the best of our knowledge, this study is the first investigation of how the GTT method is  
25 experienced and implemented from the reviewing team’s perspective. The teams found the  
26 GTT method useful whereby it identified patient harm and could be used for different  
27 specialties. They had gradually modified the original review method to suit a personal  
28 context, e.g. time dedicated for reviewing. The method was found subjective in its estimation  
29 of the, for Swedish conditions, added judgment of preventability. A nursing care perspective  
30 was missed and should be added, and insufficient documentation was a barrier to medical  
31 patient record reviewing.  
32  
33  
34  
35  
36  
37  
38  
39  
40  
41  
42  
43  
44  
45  
46  
47  
48

49 The teams made small and gradual changes in the methodology, which may have contributed  
50 to large differences in the assessments over time. They mentioned having used the method as  
51 described in the Swedish manual,[9], based on the original IHI method.[6] However,  
52 interviews revealed how teams used the method somewhat differently, occasionally even for  
53  
54  
55  
56  
57  
58  
59  
60

1  
2  
3 other purposes. For example, the nurses did not review the same charts and reach a consensus  
4  
5 about their findings as intended in the manual. Instead, they divided the charts into two parts  
6  
7 and reviewed half of them each. Some teams, besides random admissions, also reviewed the  
8  
9 records of all hospital deaths. Another example was how one team sometimes interpreted the  
10  
11 presence of triggers as equal to the occurrence of harm. From their point of view the triggers  
12  
13 indicated substandard care. If treatment had been given according to standard, the patient  
14  
15 would not have needed e.g. to be readmitted within 30 days. All teams missed a trigger for  
16  
17 “measures not performed according to standard care”, indicating that the teams could have  
18  
19 mixed quality measures and harm to patients. Also, the time limit of 20 minutes was  
20  
21 sometimes exceeded, as the records were read carefully when the RNs did not always restrict  
22  
23 themselves to look for triggers alone. A recent Danish study showed that the method was  
24  
25 initially interpreted differently at different hospitals.[24] Small changes in methodology, a  
26  
27 gradual development of skills and obtaining a patient perspective along with different team  
28  
29 composition regarding interdisciplinary representation could explain inter-rater disagreement  
30  
31 between teams. However, it is important to remember that several studies have shown the  
32  
33 superiority of record reviews in detecting and categorising AEs.[1,7,8,25-28] This was also  
34  
35 the team members’ view, considering that the most important function of the GTT method  
36  
37 was the identification of AEs. In line with Brandrud,[29] they developed new knowledge that  
38  
39 appeared to be useful locally.  
40  
41  
42  
43  
44  
45  
46

47 Even if it was also considered important to provide feedback from GTT reviews to nurses and  
48  
49 physicians on the wards, no team wanted to be regarded as controllers. They would rather  
50  
51 look at harm on a systematic level as did Resar,[30] who mentioned that focus on AEs targets  
52  
53 the system rather than the individual, and can lead to the exploration of methodology to  
54  
55 improve or enhance clinical outcomes. The advantages of the GTT method were that it could  
56  
57  
58  
59  
60

1  
2  
3 be adapted to specialties, subgroups of patients or health care processes. Safety problems can  
4  
5 be identified by medical record review leading to specific measures to prevent future harm.  
6  
7

8  
9  
10 The teams had views concerning triggers that should be added or removed. They mentioned  
11  
12 that the method included triggers never used, and those that could be used at all times, without  
13  
14 necessarily identifying AEs. The teams missed nursing care triggers, such as patient pain,  
15  
16 nutrition and elimination. They also saw a need for clinic-specific triggers. There are activity-  
17  
18 specific trigger versions for ambulatory care,[31] intensive care,[30] surgical care,[32]  
19  
20 neonatal care[28] and primary care[25]. Creating new triggers requires reflection. We agree  
21  
22 with Kaafarani,[31] on the importance of considering clinical relevance, utility and feasibility  
23  
24 of implementation when designing triggers.  
25  
26

27  
28  
29 The teams found remarkably insufficient documentation and mentioned this as a potential  
30  
31 problem for becoming more proactive in patient safety work. As the GTT method is based  
32  
33 solely on findings in patient records the teams highlighted the lack of documentation, which  
34  
35 casted doubt on how care had been conducted. This is in line with other studies.[33-35]  
36  
37 Weingart,[35] mentioned that many AEs are not recorded in the medical charts, attributable to  
38  
39 variable standards of documentation, clinical unawareness or oversight, and concern about  
40  
41 liability exposure. In our study team members mentioned finding it difficult to gain an  
42  
43 overview of the patient's illness. The same result has been shown by Stevenson and  
44  
45 Nilsson.[34] They found that essential information such as vital signs was difficult to enter  
46  
47 and locate in electronic records. It was also unclear where specific information such as blood  
48  
49 pressure and pulse should be documented.  
50  
51  
52  
53  
54  
55  
56  
57  
58  
59  
60

1  
2  
3 The team members gained greater understanding of the structure of healthcare, and also  
4  
5 looked upon AEs more from a patient perspective. Being a GTT team member allows the  
6  
7 participant new possibilities for collaboration, and a better chance to be included in a patient  
8  
9 safety context with accountability for tracking and making changes in healthcare. This is in  
10  
11 accordance with Brandrud,[29] who found three success factors for continuous quality  
12  
13 improvement; continuous and reliable information, involvement by all, and an infrastructure  
14  
15 based on improvements in knowledge.  
16  
17  
18  
19

20  
21 Focus group interviews were chosen as they encourage interaction between participants. The  
22  
23 team members in our study had worked together as teams for several years. Since we wanted  
24  
25 to reach positive and negative experiences of working with the GTT in clinical practice, we  
26  
27 tried to create an interview situation as comfortable as possible for the team members. For this  
28  
29 reason, we chose to keep the teams in their initial compositions in the focus groups.  
30  
31  
32  
33

34 One limit may be that this study was carried out in Sweden where preventability has been  
35  
36 added to the GTT method. Judgment about this was considered as subjective by the teams.  
37  
38 However, apart from the addition of preventability, the Swedish GTT method does not differ  
39  
40 from the original GTT method used in many other countries. The analysis is based on  
41  
42 propositions from the teams, but we do not know how well they reflect other teams' opinions.  
43  
44 Other GTT teams will probably have similar experiences and be able to refer to these  
45  
46 interpretations, and hopefully develop their work of patient safety. Another limitation is that  
47  
48 our study lacks questions related to how the core measurements of the GTT protocol, e.g.  
49  
50 number of AEs per 100 admissions, were analyzed and presented.  
51  
52  
53  
54

## 55 56 **Conclusions** 57 58 59 60

1  
2  
3 The GTT method was found useful and important with triggers facilitating reviewing,  
4  
5 although documentation was generally poor. The most important and difficult task as a review  
6  
7 team was to report AEs to the involved clinics. The teams gradually made small changes in  
8  
9 the methodology, which together with gradual expertise and different team composition may  
10  
11 contribute to differences between teams in the assessments over time. Despite this, we  
12  
13 conclude that the GTT method has the strength to identify AEs and could be used in  
14  
15 subgroups of patients or in different specialties.  
16  
17  
18  
19

### 20 21 **Acknowledgements**

22  
23 The authors wish to thank the teams for their efforts.  
24  
25  
26

### 27 28 **Funding statement**

29  
30 This work was supported by FORSS – the research council of southeast Sweden and the  
31  
32 County Council of Kalmar for KS. FORSS has neither been involved in any part of the study,  
33  
34 nor in writing the manuscript or in the decision to submit the manuscript for publication.  
35  
36  
37

### 38 39 **Competing interest**

40  
41 None of the authors have competing interests.  
42  
43  
44

### 45 46 **Contributors**

47  
48 Kristina Schildmeijer's responsibility; study design, acquisition of data, analysis,  
49  
50 interpretation of data, drafting the article and intellectual content.

51  
52 Lena Nilsson's responsibility; study design, drafting the article and intellectual content.

53  
54 Kristofer Årestedt's responsibility; study design, drafting the article and intellectual  
55  
56 content.  
57  
58  
59  
60

1  
2  
3  
4  
5  
6  
7  
8  
9  
10  
11  
12  
13  
14  
15  
16  
17  
18  
19  
20  
21  
22  
23  
24  
25  
26  
27  
28  
29  
30  
31  
32  
33  
34  
35  
36  
37  
38  
39  
40  
41  
42  
43  
44  
45  
46  
47  
48  
49  
50  
51  
52  
53  
54  
55  
56  
57  
58  
59  
60

Joep Perk’s responsibility; study design, and intellectual content.

Gunilla Nilsson’s responsibility; study design, acquisition of data, analysis, interpretation of data, drafting the article and intellectual content.

For peer review only

**REFERENCES**

1. Landrigan C, Parry G, Bones C, et al. Temporal trends in rates of patient harm resulting from medical care. *N Eng J Med*. 2010;**363**(22):2124-34.
2. Schioler T, Lipczak H, Pedersen BL, et al. Incidence of adverse events in hospitals. A retrospective study of medical records. *Ugeskr Laeger*. 2001;**163**(39):5370-8.
3. Soop M, Fryksmark U, Koster M, et al. The incidence of adverse events in Swedish hospitals: a retrospective medical record review study. *Int J Qual Health Care*. 2009;**21**(4):285-91.
4. Vincent C, Neale G, Woloshynowych M. Adverse events in British hospitals: preliminary retrospective record review. *BMJ*. 2001;**322**(7285):517-9.
5. Wilson R, Runciman W, Gibberd R, et al. The quality in Australian health care study. *Med J Aust*. 1995;**163**(9):458-71.
6. Griffin F, Resar R. IHI Global Trigger Tool for measuring adverse events. (Second Ed). Cambridge, Massachusetts: Institute for Healthcare Improvement, 2009.
7. Classen D, Resar R, Griffin F, et al. "Global Trigger Tool" shows that adverse events in hospitals may be ten times greater than previously measured. *Health Affairs*. 2011;**30**(4):581-9.
8. Good V, Saldana M, Gilder R, et al. Large-scale deployment of the Global Trigger Tool across a large hospital system: refinements for the characterisation of adverse events to support patient safety learning opportunities. *Qual Saf Health Care*. 2011;**20**(1):25-30.
9. Institute for Healthcare Improvement. Structured record review to identify and measure the incidence of injuries in health care by the method described Global Trigger Tool: Guide to patient safety work [Swe: Strukturerad journalgranskning för att identifiera och mäta förekomst av skador i vården enligt metoden Global Trigger Tool : Handbok för patientsäkerhetsarbete]. Institute for Healthcare Improvement Innovation 2007 (A Swedish translated and adjusted version 2008). Stockholm: Kommentus; 2008.
10. The Danish safer hospital programme. (Second Ed). Safety DsfP; 2012. <http://www.sikkerpatient.dk/in-english/the-danish-safer-hospital-programme.aspx> (accessed 18 June 2013).
11. Canadian Patient Safety Institute; 2012. <http://www.patientsafetyinstitute.ca/English/Pages/default.aspx> (accessed 18 June 2013).
12. NMOH. In safe hands. Norwegian Knowledge Centre for the Health Services; 2012. <http://www.pasientsikkerhetskampanjen.no/no/I+trygge+hender/In+English/In+Safe+Hands%3A+the+Norwegian+patient+safety+campaign+2011+-+2013.451.cms> (accessed 18 June 2013).
13. Patient safety first. (Second Ed). Agency NPS; 2012.



1  
2  
3 <http://www.patientsafetyfirst.nhs.uk/Content.aspx?path=/About-the-campaign/> (accessed 18  
4 June 2013).

5  
6 14. Naessens JM, Campbell C, Huddleston J, et al. A comparison of hospital adverse events  
7 identified by three widely used detection methods. *Int J Qual Health Care*. 2009;**21**(4):301-7.  
8

9  
10 15. Forster AJ, O'Rourke K, Shojania KG, et al. Combining ratings from multiple physician  
11 reviewers helped to overcome the uncertainty associated with adverse event classification. *J*  
12 *Clin Epidemiol*. 2007;**60**(9):892-901.  
13

14 16. Hofer TP, Bernstein SJ, DeMonner S, et al. Discussion between reviewers does not  
15 improve reliability of peer review of hospital quality. *Med Care*. 2000;**38**(2):152-61.  
16

17 17. Mattsson T, Lehmann Knudsen J, et al. Assessment of the global trigger tool to measure,  
18 monitor and evaluate patient safety in cancer patients: reliability concerns are raised. *Qual Saf*  
19 *Health Care*. 2013;**0**:1-9.  
20

21 18. Schildmeijer K, Nilsson L, Arestedt K, et al. Assessment of adverse events in medical  
22 care: lack of consistency between experienced teams using the Global Trigger Tool. *BMJ*  
23 *Qual Saf*. 2012;**21**(4):307-14.  
24

25 19. Sharek PJ, Parry G, Goldmann D, et al. Performance characteristics of a methodology to  
26 quantify adverse events over time in hospitalized patients. *Health Serv Res*. 2011;**46**(2):654-  
27 78.  
28

29 20. Krueger RA, Casey MA. *Focus Groups - A Practical Guide for Applied Research*. (Fourth  
30 Ed). Washington: SAGE; 2009.  
31

32 21. Classen DC, Lloyd RC, Provost L, et al. Development and Evaluation of the Institute for  
33 Healthcare Improvement Global Trigger Tool. *J Patient Saf*. 2008;**4**(3):169.  
34

35 22. Resar R, Rozich J, Classen D. Methodology and rationale for the measurement of harm  
36 with trigger tools. *Qual Saf Health Care*. 2003;**12**(Suppl 2):39-45.  
37

38 23. Patton MQ. *Qualitative Research & Evaluation Methods* (Third Ed). Washington: SAGE  
39 Publications Inc.; 2001.  
40

41 24. von Plessen C, Kodal A, Anhoj J. Experiences with global trigger tool reviews in five  
42 Danish hospitals: an implementation study. *BMJ Open*. 2012;**2**:1-8.  
43

44 25. de Wet C, Bowie P. The preliminary development and testing of a global trigger tool to  
45 detect error and patient harm in primary-care records. *Postgrad Med J*. 2009;**85**:176-80.  
46

47 26. Nilsson L, Pihl A, Tagsjo M, et al. Adverse events are common on the intensive care unit:  
48 results from a structured record review. *Acta Anaesthesiol Scand*. 2012;**56**(8):959-65.  
49

50 27. Rozich JD, Haraden CR, Resar RK. Adverse drug event trigger tool: a practical  
51 methodology for measuring medication related harm. *Qual Saf Health Care*. 2003;**12**(3):194-  
52 200.  
53  
54  
55  
56  
57  
58  
59  
60

- 1  
2  
3 28. Sharek P, Horbar J, Mason W, et al. Adverse events in the neonatal intensive care unit:  
4 development, testing, and findings of an NICU-focused trigger tool to identify harm in North  
5 American NICUs. *Pediatrics*. 2006;**118**(4):1332-40.  
6
- 7 29. Brandrud A, Schreiner A, Hjortdahl P, et al. Three success factors for continual  
8 improvement in healthcare: an analysis of the reports of improvement team members. *BMJ*  
9 *Qual Saf*. 2011;**20**(3):251-9.  
10
- 11 30. Resar R, Rozich J, Simmonds T, et al. A trigger tool to identify adverse events in the  
12 intensive care unit. *Jt Comm J Qual Patient Saf*. 2006;**32**(10):585-90.  
13
- 14 31. Kaafarani H, Rosen A, Nebeker J, et al. Development of trigger tools for surveillance of  
15 adverse events in ambulatory surgery. *Qual Saf Health Care*. 2010;**19**(5):425-9.  
16
- 17 32. Griffin FA, Classen DC. Detection of adverse events in surgical patients using the Trigger  
18 Tool approach. *Qual Saf Health Care*. 2008;**17**(4):253-8.  
19
- 20 33. Cheevakasemsook A, Chapman Y, Francis K, et al. The study of nursing documentation  
21 complexities. *Int J Nurs Pract*. 2006;**12**(6):366-74.  
22
- 23 34. Stevenson J, Nilsson G. Nurses' perceptions of an electronic patient record from a patient  
24 safety perspective: a qualitative study. *J Adv Nurs*. 2012;**68**(3):667-76.  
25
- 26 35. Weingart S, Pagovich O, Sands D, et al. What can hospitalized patients tell us about  
27 adverse events? Learning from patient-reported incidents. *J Gen Intern Med*. 2005;**20**(9):830-  
28 6.  
29  
30  
31  
32  
33  
34  
35  
36  
37  
38  
39  
40  
41  
42  
43  
44  
45  
46  
47  
48  
49  
50  
51  
52  
53  
54  
55  
56  
57  
58  
59  
60

1  
2  
3 **Title: Strengths and weaknesses of working with** the Global Trigger Tool method for  
4 retrospective record review - Focus group interviews **with team members**  
5  
6  
7  
8

9 Kristina Schildmeijer, RN, PhD student<sup>1</sup>

10 Lena Nilsson, MD, PhD<sup>2</sup>

11 Joep Perk, Professor<sup>1</sup>

12 Kristofer Årestedt, RN, PhD<sup>1,3,4</sup>

13 Gunilla Nilsson, RN, Assoc Prof<sup>1</sup>

- 14  
15  
16  
17  
18  
19  
20 1) School of Health and Caring Sciences, Faculty of Health and Life Sciences, Linnaeus  
21 University, S-391 82 Kalmar, Sweden  
22  
23 2) Department of Medicine and Health Sciences, Linköping University, Department of  
24 Anesthesia and Intensive Care, County Council of Östergötland, S-581 85 Linköping,  
25 Sweden  
26  
27 3) Division of Nursing Science, Department of Medical and Health Sciences, Linköping  
28 University, S-581 83 Linköping, Sweden  
29  
30 4) Palliative Research Centre, Ersta Sköndal University College and Ersta hospital, S-  
31 100 61 Stockholm, Sweden  
32  
33  
34  
35

36 Correspondence to:

37 Kristina Schildmeijer

38 Tel +46-480-44 67 62

39 Fax + 46-480-44 60 32

40 E-mail address: [kristina.schildmeijer@lnu.se](mailto:kristina.schildmeijer@lnu.se)

41  
42  
43  
44  
45  
46  
47 Keywords: Global Trigger Tool, record review, adverse events, patient safety, focus  
48 groups.  
49

50 Word count: 4213 words excluding title page, abstract, references, figures and tables  
51  
52  
53  
54  
55  
56  
57  
58  
59  
60

## ABSTRACT

**Objectives:** The aim was to describe the strengths and weaknesses, from team member perspectives, of working with the Global Trigger Tool method of retrospective record review to identify adverse events causing patient harm.

**Design:** A qualitative, descriptive approach with focus group interviews using content analysis.

**Setting:** Five Swedish hospitals in 2011.

**Participants:** Five Global Trigger Tool teams, with 5 physicians and 11 registered nurses.

**Intervention:** Five focus group interviews were carried out with the five teams. Interviews were taped and transcribed verbatim.

**Results:** Seven categories emerged relating to the strengths and weaknesses of the Global Trigger Tool method. The categories found were; *“Usefulness and use of the GTT”, “Triggers”, “Preventability of harm”, “Team composition”, “Team tasks”, “Team members’ knowledge development ” and “Documentation”*. Gradually, changes in the methodology were made by the teams, e.g. the teams reported how nurses divided up the charts into two sets, each being read respectively. The teams described the method as important and well-functioning. The most important, but also the most difficult, was the task of bringing the results back to the clinic. The teams found it easier to discuss findings at their own clinics.

**Conclusions:** The GTT method functions well for identifying adverse events and is strengthened by its adaptability to different specialties. However, small, gradual methodological changes together with continually developed expertise and adaption to looking at harm from a patient perspective may contribute to large differences in assessment over time.

## Article summary

### Article focus

The Global Trigger Tool (GTT) method for retrospective record review is a valuable tool for identifying adverse events causing patient harm, but has been criticized for subjectivity due to its being based upon the personal judgment of team members.

To improve record reviewing as a useful tool in patient safety work it is essential to gain a deeper understanding of the reviewing teams' experiences of working with the GTT method.

The article focuses on strengths and weaknesses from a team member perspective of working with the GTT method.

### Key messages

The GTT method is a useful, relevant and important tool in patient safety work.

The teams made changes in the review process over time.

GTT can be adapted to various specialties or patient groups (e.g. patients in intensive care).

Being a GTT team member provides participant with an increased understanding of the healthcare system, as well as accountability for tracking and making improvements in healthcare.

### Strengths and limitations of the study

Experienced reviewers from different sized hospitals were interviewed. All team members took the opportunity to speak as a team.

The analysis was based on propositions from the five focus group teams. However, it was not clear whether their experiences of working with the GTT method reflected the opinions of teams from other hospitals. This needs to be verified through further studies.

## Background

Adverse events (AEs) are common in healthcare. European studies report a prevalence of patient harm of 9-12%. [1-4] AEs causing patient harm can be identified through retrospective patient record reviews. [3,5] The Global Trigger Tool (GTT), developed by the Institute for Healthcare Improvement (IHI), [6] is one such increasingly used method. [7,8] It identifies AEs causing harm as experienced by patients, caused by medical treatment, not the underlying medical condition of the patient. In GTT 20 medical records from randomly chosen hospital admissions are retrospectively reviewed every month by experienced teams often consisting of two registered nurses and one physician. An advantage of the GTT is the measurement of the rate of AEs over time within an organisation, and the use of GTT for evaluating and measuring patient safety has been promoted in several countries. [9-13] GTT has been shown superior to other incident-reporting systems in identifying AEs. [7,14] On the other hand, the methodology of record reviews, including GTT, has been criticized for not being sufficiently robust, whereby judgments have been found to differ between reviewing teams. [15-18] At moderate inter-rater agreement between review teams, [17-19] a Blant-Altman analysis of the GTT method showed large random errors when comparing review teams. [17] This reduces its ability to track a true change in the level of patient harm.

In order to gain a nuanced view of record review as a tool for evaluating patient safety work, we find it important to gain a deeper understanding of the experiences from reviewing teams working with the GTT method. This knowledge could provide us with a better understanding of the strengths and weaknesses of the GTT method, which might help us to better understand causes of disagreement between teams, and provide valuable knowledge for a broader view of the GTT method and its role in patient safety work.

## Objective

The aim was to describe strengths and weaknesses, from the perspective of team members working with the Global Trigger Tool method.

## METHOD

The study was conducted using a qualitative, descriptive approach with focus group interviews as described and analyzed by Krueger & Casey.[20]

### The Global Trigger Tool method

The GTT method is based on reviewing medical records from randomly selected admissions in a structured way in an effort to identify AEs by searching for “triggers”. It is designed for utilizing small samples over time.[21,22] A “trigger” may indicate that an AE has occurred, e.g. the trigger “reoperation” indicates that an AE may have taken place at the first operation. Teams consisting of one physician and two RNs review a patient’s medical records. In the first stage, the RNs review independently noting “triggers” and associated AEs on a chart. The time limit is set at 20 minutes. The nurses then discuss their findings, and after having reached a consensus, complete a new chart together. Charts with a potential AE are forwarded to the physician. In stage two, the physician determines if an AE has occurred and, if so, the level of harm. The Swedish GTT version is modified for Swedish conditions, listing 53 triggers rather than 54 as in the original GTT method.[6] It also contains an additional item referred to as “preventability”. Preventability is graded on a scale from 1-6, with 1 being no real evidence for preventability and 6 being completely secure evidence for preventability. Preventability for each AE is judged by the physicians.[3,9] (Table 1)

**Table 1.** Description of preventability scale.

| Preventability scale |                                                         |
|----------------------|---------------------------------------------------------|
| 1                    | No real evidence for preventability                     |
| 2                    | Weak to small evidence for preventability               |
| 3                    | Preventability less likely than 50 percent, but close   |
| 4                    | Preventability more probable than 50 percent, but close |
| 5                    | Strong evidence for preventability                      |
| 6                    | Completely secure evidence for preventability           |

Classes 1-3 are considered non preventable harm.  
Classes 4-6 are considered preventable harm.[3]

## Participants

Five focus groups participated in the study. Each included one GTT review team from each of the five different sized hospitals in south-eastern Sweden. The teams had participated in an earlier study comparing reviews of the same set of records.[18] Team members were contacted by email requesting participation in focus group interviews concerning their experiences of using the GTT. All team members agreed to participate in the interviews. The 16 participants consisted of five physicians and eleven RNs. All had long experience of working in health care, and 3-5 years' experience of reviewing medical record (Table 2). Participants from the teams were part of their hospital's patient safety teams, and worked extensively with patient safety issues including the GTT on a hospital-wide level. Eleven of the 16 team members were educated in GTT reviewing by attending a one-day program and partaking yearly in a two-day regional meeting devoted to training and collaboration. The other five team members had been trained by their respective colleagues. Four of the hospitals are middle-sized with about 200 beds, and one is a university hospital with approximately 600 beds. All hospitals used electronic medical records.



**Table 2.** Team member characteristics.

| Team | Profession | Age/Gender | Experiences of Specialty (years) | Profession             | Working with GTT (years) | Formal education in GTT |
|------|------------|------------|----------------------------------|------------------------|--------------------------|-------------------------|
| I    | Physician  | 64M        | 30                               | Psychiatry             | 3                        | No                      |
|      | Nurse      | 60F        | 39                               | Midwife                | 4                        | Yes                     |
|      | Nurse      | 59F        | 37                               | Internal medicine care | 3                        | No                      |
|      | Nurse      | 63F        | 30                               | Psychiatric care       | 4                        | Yes                     |
| II   | Physician  | 54F        | 30                               | Anesthesiology         | 5                        | Yes                     |
|      | Nurse      | 39F        | 19                               | Intensive care         | 3                        | No                      |
|      | Nurse      | 38F        | 18                               | Intensive care         | 3                        | No                      |
| III  | Physician  | 64M        | 37                               | ENT (ear-nose-throat)  | 4                        | Yes                     |
|      | Nurse      | 44F        | 18                               | Emergency care         | 4                        | Yes                     |
|      | Nurse      | 63F        | 39                               | Orthopedic care        | 4                        | Yes                     |
| IV   | Physician  | 66M        | 40                               | Internal medicine      | 4                        | No                      |
|      | Nurse      | 53F        | 27                               | Internal medicine care | 4                        | Yes                     |
|      | Nurse      | 58F        | 36                               | Intensive care         | 4                        | Yes                     |
| V    | Physician  | 63M        | 35                               | Surgeon                | 4                        | Yes                     |
|      | Nurse      | 37F        | 13                               | Pediatric care         | 4                        | Yes                     |
|      | Nurse      | 58F        | 34                               | Midwife                | 4                        | Yes                     |

### Data collection

The interviews took place between January and March of 2011 at the five hospitals where the participants worked. Five 80 to 95-minute focus group interviews were conducted. One of the authors (K.S.) moderated all interviews, with an **assistant moderator** (G.N. or K.Å.). The moderator was responsible for facilitating the discussion and prompting team members to speak, while the observer recorded sessions and took notes. **K.S. had worked with the GTT method for four years on a hospital level, while G.N. and K.Å. had experience of working with qualitative studies and focus groups. Besides taking notes they were to also ensure that the moderator's pre-understanding did not affect team members' responses.** After an opening question, aimed to make team members feel comfortable, an introductory question was asked:

1  
2  
3 What are your experiences of the strengths and weaknesses of the GTT method? The  
4 introductory question was followed by transition questions; “Tell us how it was when you  
5 started reviewing by using the GTT” and “How you are presently reviewing?” The purpose of  
6 transition questions was to form a link between the introductory and key questions. The key  
7 questions captured the major areas of concern. Examples of key questions were; “From your  
8 experiences, which strengths/weaknesses do you find with the method in its entirety?” “What  
9 are your experiences of the different triggers?” and “What is your opinion on the judgement  
10 of preventability?” During the interviews, the moderator asked probing questions, e.g. “What  
11 do you mean?” or “Can you explain a little further?” Towards the ends of the interviews the  
12 moderator asked questions, e.g. if there was more to discuss, or if something needed further  
13 clarification. The moderator also summarized the key points. All interviews were recorded  
14 and transcribed verbatim. Immediately after the focus group interviews, the moderator and the  
15 assistant moderator gave a debriefing of their first impressions and compared these  
16 interpretations from those found in earlier focus groups. The transcribed interviews were  
17 returned to the team members with the question of whether they felt that the text reflected  
18 their interviews. All accepted the text.  
19  
20  
21  
22  
23  
24  
25  
26  
27  
28  
29  
30  
31  
32  
33  
34  
35  
36  
37  
38  
39  
40

#### 41 **Analysis of the interviews**

42 Interviews were analysed according to Krueger and Casey to identify patterns and discover  
43 relationships between ideas. Data analysis proceeded simultaneously with data collection until  
44 no new information emerged. The text was coded and opinions with similar meanings were  
45 grouped together until seven categories emerged. Comparisons were made throughout the  
46 analysis between categories and the text as a whole.[20]  
47  
48  
49  
50  
51  
52  
53  
54  
55  
56  
57  
58  
59  
60

1  
2  
3 Conformability, credibility and dependability are all concepts of trustworthiness.[23] To  
4 validate the findings investigator triangulation was used. Transcripts were read and reread by  
5 all researchers to gain a sense of content, sometimes returning to interview recordings to  
6 become completely familiar with the data and comprehend its essential features. With the aim  
7 of the study in mind researchers read the text and made notes and headings in the margins to  
8 include all aspects of the content. The first author (KS) established categories based on  
9 citations. To ensure conformability, co-authors discussed the categories, and changes were  
10 made until consensus was reached. To increase credibility according to Krueger and  
11 Casey,[20] at least three focus group interviews should be carried out. In this study, five focus  
12 groups were conducted. A careful description of the sampling procedure and data analyses  
13 was presented to ensure dependability. Each citation was given a number for data-reporting  
14 purposes to show evidence of reporting across responses from the five teams (Team I – Team  
15 V).

### 33 Ethical considerations

34 All members of the GTT teams gave their individual informed consent to participate in the  
35 study. Ethical permission was obtained from the Regional Ethical Board of Linköping  
36 University, Sweden (study number 2010/399-32).  
37  
38  
39  
40  
41  
42  
43  
44  
45  
46  
47  
48  
49  
50  
51  
52  
53  
54  
55  
56  
57  
58  
59  
60

## RESULTS

The categories identified were; “Usefulness and use of the GTT”, “Triggers”, “Preventability of harm”, “Team design”, “Team tasks”, “Team members’ knowledge development” and “Documentation”. Each category is presented by its strengths and weaknesses.

### Usefulness and use of the GTT

#### Strengths

Team members found the method useful in identifying patient harm. An advantage was that the method, apart from being used in a random selection of records, could also be used by specific specialties, or for a subgroup of patients, i.e. for deceased patients.

*“It is a useful tool; it is relevant and it identifies harm. I feel that it is important. It feels that the tool can positively affect healthcare...” (II).*

Most often RNs could easily make their assessments within 20 minutes, pointing out the time limit as a strong point of the method.

*“You quickly find what you need when you have figured out how to review” (I).*

While some RNs felt it better to review medical records outside their specialties, others found it easier to examine records from their own speciality.

*“It is easier to understand why certain things were done when you review your own area” (IV).*

#### Weaknesses

The teams gave careful reports on how they previously performed audits, and all mentioned that they used the method as described in the handbook. Still, all teams made changes in the review process. For example, in the manual it states that the two RNs in the team should

1  
2  
3 review the same records separately and then reach a consensus. Instead, all RN teams reported  
4  
5 dividing the charts into two sets and reading them separately.  
6

7 *“It is good to sit together and talk, but we no longer review the same records” (V).*

8  
9 The RNs sometimes thought it hard to restrict themselves to looking only for triggers and  
10  
11 associated possible harm as indicated in the chart, when they found other striking things in  
12  
13 patient records. This led them to use the method for purposes other than those originally  
14  
15 intended. In such cases they chose to mark these findings on the GTT chart and discuss them  
16  
17 with the team.  
18  
19

20  
21 *“When I find things that make me react I include them. They may be important in other  
22  
23 contexts” (I).*

24  
25 Even if all teams considered the method useful, they also mentioned that it was oriented  
26  
27 mainly towards harm connected to actions undertaken by physicians. A nursing care  
28  
29 perspective was missing and was requested.  
30

31  
32 *“One wishes it (the GTT) was more care oriented...lack of care can also harm patients” (IV).*

33  
34 All teams talked about the method’s weakness in not capturing all failures, as omission is not  
35  
36 part of the GTT.  
37

38  
39 *“There is no trigger for omission. When reading notes, one sometimes wonders why no one  
40  
41 has reacted” (V).*

42  
43 Even if the time limit was not considered a major problem, there were still situations when the  
44  
45 time limit was a problem, e.g. where patients had experienced a long period of care. RNs  
46  
47 mentioned that in some cases the time limit was exceeded.  
48

49  
50 *“We read the records very carefully; and 20 minutes was in no way enough!” (IV).*

51  
52 When reviewing records from their own area there was a risk for the RNs becoming  
53  
54 insensible, regarding patient harm as something that just happens.  
55  
56  
57  
58  
59  
60

1  
2  
3 “You are more forgiving in your own area, *you become blind. Therefore, it is good that*  
4 *reviewers are from different clinics*” (III).  
5  
6  
7

## 8 9 **Triggers**

### 10 **Strengths**

11  
12 The teams found the triggers’ intuitive in a sense that they were easy to keep in mind covering  
13 wide areas and facilitating reviewing.  
14  
15

16  
17 “The triggers are good and useful (I).  
18  
19

### 20 **Weaknesses**

21  
22 Even if all teams were satisfied with the GTT method, they found that some triggers were  
23 imprecise, and some never used.  
24  
25

26  
27 “The trigger “treatment” *is vague and can always or never be used*” (II).  
28  
29

30 The team members’ affiliations influenced to some extent their statements about **a need for**  
31 **additional** triggers. All teams mentioned that a trigger for “failure or measures not been  
32 performed as intended” was missing. The teams also said that several nursing care triggers  
33 were missing and should be added.  
34  
35

36  
37 “*Triggers evaluating harm in the areas of nutrition, elimination, pain and oral hygiene are*  
38 *all missing*” (IV).  
39  
40

41  
42 One team mentioned that bad behaviour by health care providers was not brought up.

43  
44 “The method is not designed for assessing personnel behaviour from a patient perspective”  
45  
46  
47 (I).  
48  
49

## 50 **Preventability of harm**

### 51 **Strengths**

52  
53  
54  
55  
56  
57  
58  
59  
60

1  
2  
3 The teams mentioned that development of health care processes and the work of patient safety  
4 required new thinking and that the, for Swedish conditions added “judgment of  
5 preventability”, helped them in achieving this view. The question “Could this have been done  
6 differently?” in the sentence “Could we have prevented this from happening?” provided an  
7 opportunity to consider preventability from more than one perspective.  
8  
9

10  
11  
12  
13  
14 *“To gain improvement you must consider many findings as avoidable. It may be avoidable if  
15 things are done differently” (III).*

### 16 17 18 **Weaknesses**

19  
20 When “judgment of preventability” came up for discussion, all teams considered the concept  
21 as too subjective. They felt there would be as many answers as the number of people asked.  
22

23  
24  
25 *“Determining harm to the patient is easy but the judgment of preventability is difficult” (I).*  
26  
27

### 28 29 30 **Team composition**

#### 31 32 **Strengths**

33  
34 The teams found strength in their interdisciplinary representation of healthcare specialities.

35  
36 Several personnel categories to consider patient care from different perspectives were  
37 considered a prerequisite for the implementation of healthcare improvements.  
38

39  
40  
41 *“To gain good results, everyone’s efforts are necessary and important; we see things  
42 differently” (II).*  
43

#### 44 45 **Weaknesses**

46  
47 A sufficient number of reviewers were considered important for avoiding problems in the  
48 event of reviewers dropping out. Too few reviewers led to team vulnerability due to the risk  
49 of team members being unavailable.  
50

51  
52  
53 *“At least four reviewers are required” (I).*  
54

55  
56 It was also important for team members to continue reviewing for long periods of time.  
57  
58  
59  
60

1  
2  
3 “You probably need, in any case, at least some years’ of experience *of reviewing*” (IV).  
4

5 However, the team also saw a danger in *remaining* too long *as a reviewer*, due to possible  
6  
7 increasing tolerance toward AEs or substandard care.  
8

9  
10 *“What I’m wondering about is that there is a risk of becoming less careful, to put things aside*  
11 *thinking that this is nothing”* (II).  
12  
13

## 14 15 16 **Tasks**

### 17 18 **Strengths**

19  
20 The interdisciplinary composition of the teams made it easier to take up reviewed events for  
21  
22 discussion, *not only within the team but also with others*. Physicians discussed with other  
23  
24 physicians, while nurses discussed with colleagues from their own departments.  
25

26  
27 *“After reviewing I discussed findings with my colleagues”* (IV).  
28

### 29 30 **Weaknesses**

31  
32 Teams sought intensified discussions to increase the work of quality improvement of patient  
33  
34 safety. They agreed their most important task was to convey results back to their clinics. This  
35  
36 was difficult when randomly reviewing records from an entire hospital.  
37

38  
39 *“Our ambition is to go to the *different* clinics and tell them directly of our concerns for their*  
40 *specific problems”* (I).  
41

42  
43 Even if the teams would have liked to provide feedback to the clinics, they were concerned  
44  
45 about how their findings would be received.  
46

47  
48 *“We do not want them to *look at us as police officers*, but wish to review and return to the*  
49 *clinics with our findings with the aim of improving things”* (I).  
50  
51

## 52 53 54 **Team member’s knowledge development**

### 55 56 **Strengths**

57  
58  
59  
60



1  
2  
3 All teams had used the GTT on a monthly basis from three to five years for their hospital's  
4 patient safety work and were accustomed to reviewing patient records from the perspective of  
5 various medical specialities. Team members believed they had developed their skills  
6 gradually. They had also gained a greater understanding of the health care system during their  
7 time on the GTT team. They had increased their skills of how to and how not to document  
8 through the reading of patient records.

9  
10  
11  
12  
13  
14  
15  
16 *"You learn a lot by reading others' notes on **how to better carry out documentation**" (IV).*

17 They also mentioned they could better observe care and harm from the patient's perspective.

18  
19  
20  
21 *"It (GTT) requires time to be able to say that from the patient's perspective harm has  
22 occurred" (II).*

## 23 24 25 26 27 **Documentation**

### 28 29 **Strengths**

30  
31 The teams considered nurses more **accurate and precise** in their documentation than  
32 physicians; and it was the nurse's **notes** that revealed the greatest number of AEs and **helped**  
33 **the most to determine** levels of harm. Nursing care documentation was richer in its comments  
34 about the patients' conditions during hospital stay.

35  
36  
37  
38  
39  
40  
41 *"Nurses' notes are much more **detailed**, concerning, **for example**, urinary infections and how  
42 the patient really feels" (V).*

### 43 44 45 **Weaknesses**

46  
47 Although the teams felt they had identified patient harm through the nurses' documentation,  
48 they considered documentation generally poor. They described sparse and duplicated  
49 documentation. The **teams mentioned** that minor incidents during hospital stay, causing minor  
50 patient harm, were not mentioned **at all** in the **discharge letter**.

51  
52  
53  
54  
55  
56  
57 *"There is a considerable amount of duplicated documentation" (I).*

1  
2  
3 “Medical records summaries are often written after the care episode and are very sparse,  
4  
5 small incidents aren’t mentioned at all” (V).  
6

7 The teams felt they had to look through a large body of text that sometimes made it difficult  
8  
9 to orient themselves in the patients’ medical records. They also felt that some of the notes had  
10  
11 no real impact on patient care, which influenced their overview of the patients’ medical  
12  
13 records. Sometimes it was hard for team members to understand how patient care had actually  
14  
15 been conducted, making review more difficult.  
16

17  
18 “There is so much text that it becomes unmanageable, you get no clear picture of the patient’s  
19  
20 condition” (III).  
21

22  
23 “One sometimes wonders how care has been carried out” (I).  
24  
25  
26

## 27 DISCUSSION

28  
29 To the best of our knowledge, this study is the first investigation of how the GTT method is  
30  
31 experienced and implemented from the reviewing team’s perspective. The teams found the  
32  
33 GTT method useful whereby it identified patient harm and could be used for different  
34  
35 specialties. They had gradually modified the original review method to suit a personal  
36  
37 context, e.g. time dedicated for reviewing. The method was found subjective in its estimation  
38  
39 of the, for Swedish conditions, added judgment of preventability. A nursing care perspective  
40  
41 was missed and should be added, and insufficient documentation was a barrier to medical  
42  
43 patient record reviewing.  
44  
45  
46

47  
48  
49 The teams made small and gradual changes in the methodology, which may have contributed  
50  
51 to large differences in the assessments over time. They mentioned having used the method as  
52  
53 described in the Swedish manual,[9], based on the original IHI method.[6] However,  
54  
55 interviews revealed how teams used the method somewhat differently, occasionally even for  
56  
57  
58  
59  
60

1  
2  
3 other purposes. For example, the nurses did not review the same charts and reach a consensus  
4  
5 about their findings as intended in the manual. Instead, they divided the charts into two parts  
6  
7 and reviewed half of them each. Some teams, besides random admissions, also reviewed the  
8  
9 records of all hospital deaths. Another example was how one team sometimes interpreted the  
10  
11 presence of triggers as equal to the occurrence of harm. From their point of view the triggers  
12  
13 indicated substandard care. If treatment had been given according to standard, the patient  
14  
15 would not have needed e.g. to be readmitted within 30 days. All teams missed a trigger for  
16  
17 “measures not performed according to standard care”, indicating that the teams could have  
18  
19 mixed quality measures and harm to patients. Also, the time limit of 20 minutes was  
20  
21 sometimes exceeded, as the records were read carefully when the RNs did not always restrict  
22  
23 themselves to look for triggers alone. A recent Danish study showed that the method was  
24  
25 initially interpreted differently at different hospitals.[24] Small changes in methodology, a  
26  
27 gradual development of skills and obtaining a patient perspective along with different team  
28  
29 composition regarding interdisciplinary representation could explain inter-rater disagreement  
30  
31 between teams. However, it is important to remember that several studies have shown the  
32  
33 superiority of record reviews in detecting and categorising AEs.[1,7,8,25-28] This was also  
34  
35 the team members’ view, considering that the most important function of the GTT method  
36  
37 was the identification of AEs. In line with Brandrud,[29] they developed new knowledge that  
38  
39 appeared to be useful locally.  
40  
41  
42  
43  
44  
45  
46

47 Even if it was also considered important to provide feedback from GTT reviews to nurses and  
48  
49 physicians on the wards, no team wanted to be regarded as controllers. They would rather  
50  
51 look at harm on a systematic level as did Resar,[30] who mentioned that focus on AEs targets  
52  
53 the system rather than the individual, and can lead to the exploration of methodology to  
54  
55 improve or enhance clinical outcomes. The advantages of the GTT method were that it could  
56  
57  
58  
59  
60

1  
2  
3 be adapted to specialties, subgroups of patients or health care processes. Safety problems can  
4  
5 be identified by medical record review leading to specific measures to prevent future harm.  
6  
7

8  
9  
10 The teams had **views concerning** triggers that should be added or removed. They mentioned  
11  
12 that the method included triggers never used, and **those** that could be used at all times, without  
13  
14 necessarily identifying AEs. The teams missed nursing care triggers, such as patient pain,  
15  
16 nutrition and elimination. They also saw a need for clinic-specific triggers. There are activity-  
17  
18 specific trigger versions for ambulatory care,[31] intensive care,[30] surgical care,[32]  
19  
20 neonatal care[28] and primary care[25]. Creating new triggers requires reflection. We agree  
21  
22 with Kaafarani,[31] on the importance of considering clinical relevance, utility and feasibility  
23  
24 of implementation when designing triggers.  
25  
26

27  
28  
29 The teams found **remarkably** insufficient documentation and mentioned this as a potential  
30  
31 problem for becoming more proactive in patient safety work. As the GTT method is based  
32  
33 solely on findings in patient records the teams highlighted the lack of documentation, **which**  
34  
35 **casted doubt on** how care had been conducted. This is in line with other studies.[33-35]  
36  
37 Weingart,[35] mentioned that many AEs are not recorded in the medical charts, attributable to  
38  
39 variable standards of documentation, clinical unawareness or oversight, and concern about  
40  
41 liability exposure. In our study team members mentioned finding it difficult to gain an  
42  
43 overview of the patient's illness. The same result has been shown by Stevenson and  
44  
45 Nilsson.[34] They found that essential information such as vital signs was difficult to enter  
46  
47 and locate in electronic records. It was also unclear where specific information such as blood  
48  
49 pressure and pulse should be documented.  
50  
51  
52  
53  
54  
55  
56  
57  
58  
59  
60

1  
2  
3 The team members gained greater understanding of the structure of healthcare, and also  
4 looked upon AEs more from a patient perspective. Being a GTT team member allows the  
5 participant new possibilities for collaboration, and a better chance to be included in a patient  
6 safety context with accountability for tracking and making changes in healthcare. This is in  
7 accordance with Brandrud,[29] who found three success factors for continuous quality  
8 improvement; continuous and reliable information, involvement by all, and an infrastructure  
9 based on improvements in knowledge.  
10  
11  
12  
13  
14  
15  
16  
17  
18  
19

20 Focus group interviews were chosen as they encourage interaction between participants. The  
21 team members in our study had worked together as teams for several years. Since we wanted  
22 to reach positive and negative experiences of working with the GTT in clinical practice, we  
23 tried to create an interview situation as comfortable as possible for the team members. For this  
24 reason, we chose to keep the teams in their initial compositions in the focus groups.  
25  
26  
27  
28  
29  
30  
31  
32  
33

34 One limit may be that this study was carried out in Sweden where preventability has been  
35 added to the GTT method. Judgment about this was considered as subjective by the teams.  
36 However, apart from the addition of preventability, the Swedish GTT method does not differ  
37 from the original GTT method used in many other countries. The analysis is based on  
38 propositions from the teams, but we do not know how well they reflect other teams' opinions.  
39 Other GTT teams will probably have similar experiences and be able to refer to these  
40 interpretations, and hopefully develop their work of patient safety. Another limitation is that  
41 our study lacks questions related to how the core measurements of the GTT protocol, e.g.  
42 number of AEs per 100 admissions, were analyzed and presented.  
43  
44  
45  
46  
47  
48  
49  
50  
51  
52  
53  
54

## 55 56 **Conclusions** 57 58 59 60

1  
2  
3 The GTT method was found useful and important with triggers facilitating reviewing,  
4  
5 although documentation was generally poor. The most important and difficult task as a review  
6  
7 team was to report AEs to the involved clinics. The teams gradually made small changes in  
8  
9 the methodology, which together with gradual expertise and different team composition may  
10  
11 contribute to differences between teams in the assessments over time. Despite this, we  
12  
13 conclude that the GTT method has the strength to identify AEs and could be used in  
14  
15 subgroups of patients or in different specialties.  
16  
17  
18  
19

### 20 21 **Acknowledgements**

22  
23 The authors wish to thank the teams for their efforts.  
24  
25  
26

### 27 28 **Funding statement**

29  
30 This work was supported by FORSS – the research council of southeast Sweden and the  
31  
32 County Council of Kalmar for KS. FORSS has neither been involved in any part of the study,  
33  
34 nor in writing the manuscript or in the decision to submit the manuscript for publication.  
35  
36  
37

### 38 39 **Competing interest**

40  
41 None of the authors have competing interests.  
42  
43  
44

### 45 46 **Contributors**

47  
48 Kristina Schildmeijer's responsibility; study design, acquisition of data, analysis,  
49  
50 interpretation of data, drafting the article and intellectual content.

51  
52 Lena Nilsson's responsibility; study design, drafting the article and intellectual content.

53  
54 Kristofer Årestedt's responsibility; study design, drafting the article and intellectual  
55  
56 content.  
57  
58  
59  
60

1  
2  
3  
4  
5  
6  
7  
8  
9  
10  
11  
12  
13  
14  
15  
16  
17  
18  
19  
20  
21  
22  
23  
24  
25  
26  
27  
28  
29  
30  
31  
32  
33  
34  
35  
36  
37  
38  
39  
40  
41  
42  
43  
44  
45  
46  
47  
48  
49  
50  
51  
52  
53  
54  
55  
56  
57  
58  
59  
60

Joep Perk’s responsibility; study design, and intellectual content.

Gunilla Nilsson’s responsibility; study design, acquisition of data, analysis, interpretation of data, drafting the article and intellectual content.

For peer review only

**REFERENCES**

1. Landrigan C, Parry G, Bones C, et al. Temporal trends in rates of patient harm resulting from medical care. *N Eng J Med*. 2010;**363**(22):2124-34.
2. Schioler T, Lipczak H, Pedersen BL, et al. Incidence of adverse events in hospitals. A retrospective study of medical records. *Ugeskr Laeger*. 2001;**163**(39):5370-8.
3. Soop M, Fryksmark U, Koster M, et al. The incidence of adverse events in Swedish hospitals: a retrospective medical record review study. *Int J Qual Health Care*. 2009;**21**(4):285-91.
4. Vincent C, Neale G, Woloshynowych M. Adverse events in British hospitals: preliminary retrospective record review. *BMJ*. 2001;**322**(7285):517-9.
5. Wilson R, Runciman W, Gibberd R, et al. The quality in Australian health care study. *Med J Aust*. 1995;**163**(9):458-71.
6. Griffin F, Resar R. IHI Global Trigger Tool for measuring adverse events. (Second Ed). Cambridge, Massachusetts: Institute for Healthcare Improvement, 2009.
7. Classen D, Resar R, Griffin F, et al. "Global Trigger Tool" shows that adverse events in hospitals may be ten times greater than previously measured. *Health Affairs*. 2011;**30**(4):581-9.
8. Good V, Saldana M, Gilder R, et al. Large-scale deployment of the Global Trigger Tool across a large hospital system: refinements for the characterisation of adverse events to support patient safety learning opportunities. *Qual Saf Health Care*. 2011;**20**(1):25-30.
9. Institute for Healthcare Improvement. Structured record review to identify and measure the incidence of injuries in health care by the method described Global Trigger Tool: Guide to patient safety work [Swe: Strukturerad journalgranskning för att identifiera och mäta förekomst av skador i vården enligt metoden Global Trigger Tool : Handbok för patientsäkerhetsarbete]. Institute for Healthcare Improvement Innovation 2007 (A Swedish translated and adjusted version 2008). Stockholm: Kommentus; 2008.
10. The Danish safer hospital programme. (Second Ed). Safety DsfP; 2012. <http://www.sikkerpatient.dk/in-english/the-danish-safer-hospital-programme.aspx> (accessed 18 June 2013).
11. Canadian Patient Safety Institute; 2012. <http://www.patientsafetyinstitute.ca/English/Pages/default.aspx> (accessed 18 June 2013).
12. NMOH. In safe hands. Norwegian Knowledge Centre for the Health Services; 2012. <http://www.pasientsikkerhetskampanjen.no/no/I+trygge+hender/In+English/In+Safe+Hands%3A+the+Norwegian+patient+safety+campaign+2011+-+2013.451.cms> (accessed 18 June 2013).
13. Patient safety first. (Second Ed). Agency NPS; 2012.



1  
2  
3 <http://www.patientsafetyfirst.nhs.uk/Content.aspx?path=/About-the-campaign/> (accessed 18  
4 June 2013).

5  
6 14. Naessens JM, Campbell C, Huddleston J, et al. A comparison of hospital adverse events  
7 identified by three widely used detection methods. *Int J Qual Health Care*. 2009;**21**(4):301-7.

8  
9 15. Forster AJ, O'Rourke K, Shojania KG, et al. Combining ratings from multiple physician  
10 reviewers helped to overcome the uncertainty associated with adverse event classification. *J*  
11 *Clin Epidemiol*. 2007;**60**(9):892-901.

12  
13 16. Hofer TP, Bernstein SJ, DeMonner S, et al. Discussion between reviewers does not  
14 improve reliability of peer review of hospital quality. *Med Care*. 2000;**38**(2):152-61.

15  
16 17. Mattsson T, Lehmann Knudsen J, et al. Assessment of the global trigger tool to measure,  
17 monitor and evaluate patient safety in cancer patients: reliability concerns are raised. *Qual Saf*  
18 *Health Care*. 2013;**0**:1-9.

19  
20 18. Schildmeijer K, Nilsson L, Arestedt K, et al. Assessment of adverse events in medical  
21 care: lack of consistency between experienced teams using the Global Trigger Tool. *BMJ*  
22 *Qual Saf*. 2012;**21**(4):307-14.

23  
24 19. Sharek PJ, Parry G, Goldmann D, et al. Performance characteristics of a methodology to  
25 quantify adverse events over time in hospitalized patients. *Health Serv Res*. 2011;**46**(2):654-  
26 78.

27  
28 20. Krueger RA, Casey MA. *Focus Groups - A Practical Guide for Applied Research*. (Fourth  
29 Ed). Washington: SAGE; 2009.

30  
31 21. Classen DC, Lloyd RC, Provost L, et al. Development and Evaluation of the Institute for  
32 Healthcare Improvement Global Trigger Tool. *J Patient Saf*. 2008;**4**(3):169.

33  
34 22. Resar R, Rozich J, Classen D. Methodology and rationale for the measurement of harm  
35 with trigger tools. *Qual Saf Health Care*. 2003;**12**(Suppl 2):39-45.

36  
37 23. Patton MQ. *Qualitative Research & Evaluation Methods* (Third Ed). Washington: SAGE  
38 Publications Inc.; 2001.

39  
40 24. von Plessen C, Kodal A, Anhoj J. Experiences with global trigger tool reviews in five  
41 Danish hospitals: an implementation study. *BMJ Open*. 2012;**2**:1-8.

42  
43 25. de Wet C, Bowie P. The preliminary development and testing of a global trigger tool to  
44 detect error and patient harm in primary-care records. *Postgrad Med J*. 2009;**85**:176-80.

45  
46 26. Nilsson L, Pihl A, Tagsjo M, et al. Adverse events are common on the intensive care unit:  
47 results from a structured record review. *Acta Anaesthesiol Scand*. 2012;**56**(8):959-65.

48  
49 27. Rozich JD, Haraden CR, Resar RK. Adverse drug event trigger tool: a practical  
50 methodology for measuring medication related harm. *Qual Saf Health Care*. 2003;**12**(3):194-  
51 200.

- 1  
2  
3 28. Sharek P, Horbar J, Mason W, et al. Adverse events in the neonatal intensive care unit:  
4 development, testing, and findings of an NICU-focused trigger tool to identify harm in North  
5 American NICUs. *Pediatrics*. 2006;**118**(4):1332-40.  
6
- 7 29. Brandrud A, Schreiner A, Hjortdahl P, et al. Three success factors for continual  
8 improvement in healthcare: an analysis of the reports of improvement team members. *BMJ*  
9 *Qual Saf*. 2011;**20**(3):251-9.  
10
- 11 30. Resar R, Rozich J, Simmonds T, et al. A trigger tool to identify adverse events in the  
12 intensive care unit. *Jt Comm J Qual Patient Saf*. 2006;**32**(10):585-90.  
13
- 14 31. Kaafarani H, Rosen A, Nebeker J, et al. Development of trigger tools for surveillance of  
15 adverse events in ambulatory surgery. *Qual Saf Health Care*. 2010;**19**(5):425-9.  
16
- 17 32. Griffin FA, Classen DC. Detection of adverse events in surgical patients using the Trigger  
18 Tool approach. *Qual Saf Health Care*. 2008;**17**(4):253-8.  
19
- 20 33. Cheevakasemsook A, Chapman Y, Francis K, et al. The study of nursing documentation  
21 complexities. *Int J Nurs Pract*. 2006;**12**(6):366-74.  
22
- 23 34. Stevenson J, Nilsson G. Nurses' perceptions of an electronic patient record from a patient  
24 safety perspective: a qualitative study. *J Adv Nurs*. 2012;**68**(3):667-76.  
25
- 26 35. Weingart S, Pagovich O, Sands D, et al. What can hospitalized patients tell us about  
27 adverse events? Learning from patient-reported incidents. *J Gen Intern Med*. 2005;**20**(9):830-  
28 6.  
29  
30  
31  
32  
33  
34  
35  
36  
37  
38  
39  
40  
41  
42  
43  
44  
45  
46  
47  
48  
49  
50  
51  
52  
53  
54  
55  
56  
57  
58  
59  
60



**Strengths and weaknesses of working with the Global Trigger Tool method for retrospective record review - Focus group interviews with team members**

|                                 |                                                                                                                                                                                                                                                                                                                                                                                                                                                                                                                                    |
|---------------------------------|------------------------------------------------------------------------------------------------------------------------------------------------------------------------------------------------------------------------------------------------------------------------------------------------------------------------------------------------------------------------------------------------------------------------------------------------------------------------------------------------------------------------------------|
| Journal:                        | <i>BMJ Open</i>                                                                                                                                                                                                                                                                                                                                                                                                                                                                                                                    |
| Manuscript ID:                  | bmjopen-2013-003131.R2                                                                                                                                                                                                                                                                                                                                                                                                                                                                                                             |
| Article Type:                   | Research                                                                                                                                                                                                                                                                                                                                                                                                                                                                                                                           |
| Date Submitted by the Author:   | 13-Aug-2013                                                                                                                                                                                                                                                                                                                                                                                                                                                                                                                        |
| Complete List of Authors:       | Schildmeijer, Kristina; Faculty of Health and Life Sciences, Linnaeus University<br>Nilsson, Lena; Division of Drug Research, Anesthesiology and Intensive Care, Department of Medical and Health Sciences, Faculty of Health Sciences, Linköping University, Department of Anesthesia and Intensive Care<br>Perk, Joep; Faculty of Health and Life Sciences, University of Linneus Årestedt, Kristofer; Department of Medical and Health Sciences, Linköping University<br>Nilsson, Gunilla; Faculty of Health and Life Sciences, |
| <b>Primary Subject Heading</b>: | Qualitative research                                                                                                                                                                                                                                                                                                                                                                                                                                                                                                               |
| Secondary Subject Heading:      | Health services research, Evidence based practice                                                                                                                                                                                                                                                                                                                                                                                                                                                                                  |
| Keywords:                       | Health & safety < HEALTH SERVICES ADMINISTRATION & MANAGEMENT, Quality in health care < HEALTH SERVICES ADMINISTRATION & MANAGEMENT, QUALITATIVE RESEARCH, Adverse events < THERAPEUTICS                                                                                                                                                                                                                                                                                                                                           |
|                                 |                                                                                                                                                                                                                                                                                                                                                                                                                                                                                                                                    |

**Title:** Strengths and weaknesses of working with the Global Trigger Tool method for retrospective record review - Focus group interviews with team members

Kristina Schildmeijer, RN, PhD student<sup>1</sup>

Lena Nilsson, MD, PhD<sup>2</sup>

Joep Perk, Professor<sup>1</sup>

Kristofer Årestedt, RN, PhD<sup>1,3,4</sup>

Gunilla Nilsson, RN, Assoc Prof<sup>1</sup>

- 1) School of Health and Caring Sciences, Faculty of Health and Life Sciences, Linnaeus University, S-391 82 Kalmar, Sweden
- 2) Department of Medicine and Health Sciences, Linköping University, Department of Anesthesia and Intensive Care, County Council of Östergötland, S-581 85 Linköping, Sweden
- 3) Division of Nursing Science, Department of Medical and Health Sciences, Linköping University, S-581 83 Linköping, Sweden
- 4) Palliative Research Centre, Ersta Sköndal University College and Ersta hospital, S-100 61 Stockholm, Sweden

Correspondence to:

Kristina Schildmeijer

Tel +46-480-44 67 62

Fax + 46-480-44 60 32

E-mail address: [kristina.schildmeijer@lnu.se](mailto:kristina.schildmeijer@lnu.se)

**Keywords:** Global Trigger Tool, record review, adverse events, patient safety, focus groups.

**Word count:** 4684 words excluding title page, abstract, references, figures and tables

## ABSTRACT

**Objectives:** The aim was to describe the strengths and weaknesses, from team member perspectives, of working with the Global Trigger Tool method of retrospective record review to identify adverse events causing patient harm.

**Design:** A qualitative, descriptive approach with focus group interviews using content analysis.

**Setting:** Five Swedish hospitals in 2011.

**Participants:** Five Global Trigger Tool teams, with 5 physicians and 11 registered nurses.

**Intervention:** Five focus group interviews were carried out with the five teams. Interviews were taped and transcribed verbatim.

**Results:** Eight categories emerged relating to the strengths and weaknesses of the Global Trigger Tool method. The categories found were; *“Usefulness of the GTT”*, *“Application of the GTT”*, *“Triggers”*, *“Preventability of harm”*, *“Team composition”*, *“Team tasks”*, *“Team members’ knowledge development ”* and *“Documentation”*. Gradually, changes in the methodology were made by the teams, e.g. the teams reported how the registered nurses divided up the charts into two sets, each being read respectively. The teams described the method as important and well-functioning. The most important, but also the most difficult, was the task of bringing the results back to the clinic. The teams found it easier to discuss findings at their own clinics.

**Conclusions:** The GTT method functions well for identifying adverse events and is strengthened by its adaptability to different specialties. However, small, gradual methodological changes together with continually developed expertise and adaption to looking at harm from a patient perspective may contribute to large differences in assessment over time.

ARTICLE SUMMARY

## Article summary

### Article focus

The Global Trigger Tool (GTT) method for retrospective record review is a valuable tool for identifying adverse events causing patient harm, but has been criticized for subjectivity due to its being based upon the personal judgment of team members.

To improve record reviewing as a useful tool in patient safety work it is essential to gain a deeper understanding of the reviewing teams' experiences of working with the GTT method.

The article focuses on strengths and weaknesses from a team member perspective of working with the GTT method.

### Key messages

The GTT method is a useful, relevant and important tool in patient safety work.

The teams made changes in the review process over time.

GTT can be adapted to various specialties or patient groups (e.g. patients in intensive care).

Being a GTT team member provides participant with an increased understanding of the healthcare system, as well as accountability for tracking and making improvements in healthcare.

### Strengths and limitations of the study

Experienced reviewers from different sized hospitals were interviewed. All team members took the opportunity to speak as a team.

The analysis was based on propositions from the five focus group teams. However, it was not clear whether their experiences of working with the GTT method reflected the opinions of teams from other hospitals or under other circumstances. This needs to be verified through further studies.

## Background

Adverse events (AEs) are common in healthcare. European studies report a prevalence of patient harm of 9-12%. [1-4] AEs causing patient harm can be identified through retrospective patient record reviews. [3,5] The Global Trigger Tool (GTT), developed by the Institute for Healthcare Improvement (IHI), [6] is one such method, primarily intended for following the level of AEs on a hospital level, that has been increasingly used. [7,8] It identifies AEs causing patient harm caused by medical treatment, not the underlying medical condition of the patient. In GTT 20 medical records from randomly chosen hospital admissions are retrospectively reviewed every month by experienced teams often consisting of two registered nurses (RNs) and one physician. An advantage of the GTT is the measurement of the rate of AEs over time within an organisation, and the use of GTT for evaluating and measuring patient safety has been promoted in several countries. [9-13] GTT has been shown superior to other incident-reporting systems in identifying AEs. [7,14] On the other hand, the methodology of record reviews, including GTT, has been criticized for not being sufficiently robust, whereby judgments have been found to differ between reviewing teams. [15-18] At moderate inter-rater agreement between review teams in oncological care, [17-19] a Blant-Altman analysis of the GTT method showed large random errors when comparing review teams. [17] This reduces its ability to track a true change in the level of patient harm.

In order to gain a nuanced view of record review as a tool for evaluating patient safety work, we find it important to gain a deeper understanding of the experiences from reviewing teams working with the GTT method. This knowledge could provide us with a better understanding of the strengths and weaknesses of the GTT method, which might help us to better understand

1  
2  
3 causes of disagreement between teams, and provide valuable knowledge for a broader view of  
4  
5 the GTT method and its role in patient safety work.  
6  
7

### 8 9 **Objective**

10 The aim was to describe strengths and weaknesses, from the perspective of team members  
11  
12 working with the Global Trigger Tool method.  
13  
14

### 15 16 17 18 **METHOD**

19 The study was conducted using a qualitative, descriptive approach with focus group  
20  
21 interviews as described and analyzed by Krueger & Casey.[20]  
22  
23  
24

### 25 26 27 **The Global Trigger Tool method**

28 The GTT method is based on reviewing medical records from randomly selected admissions  
29  
30 in a structured way in an effort to identify AEs by searching for “triggers”. It is designed for  
31  
32 utilizing small samples over time from a hospital or a healthcare organization.[21,22] A  
33  
34 “trigger” may indicate that an AE has occurred, e.g. the trigger “patient fall”, indicating for  
35  
36 instance a side effect of drugs that can cause patient harm from a fall. Teams consisting of one  
37  
38 physician and two RNs review a patient’s medical records. In the first stage, the RNs review  
39  
40 independently noting “triggers” and associated AEs on a chart. The time limit is set at 20  
41  
42 minutes. The nurses then discuss their findings, and after having reached a consensus,  
43  
44 complete a new chart together. Charts with a potential AE are forwarded to the physician. In  
45  
46 stage two, the physician determines if an AE has occurred and, if so, the level of harm. The  
47  
48 Swedish GTT version is modified for Swedish conditions, listing 53 triggers rather than 54 as  
49  
50 in the original GTT method.[6] It also contains an additional item referred to as  
51  
52 “preventability”. Preventability is graded on a scale from 1-6, with 1 being no real evidence  
53  
54  
55  
56  
57  
58  
59  
60



for preventability and 6 being completely secure evidence for preventability. Preventability for each AE is judged by the physicians.[3,9] (Table 1)

**Table 1.** Description of preventability scale.

| <b>Preventability scale</b> |                                                         |
|-----------------------------|---------------------------------------------------------|
| 1                           | No real evidence for preventability                     |
| 2                           | Weak to small evidence for preventability               |
| 3                           | Preventability less likely than 50 percent, but close   |
| 4                           | Preventability more probable than 50 percent, but close |
| 5                           | Strong evidence for preventability                      |
| 6                           | Completely secure evidence for preventability           |

Classes 1-3 are considered non preventable harm.  
Classes 4-6 are considered preventable harm.[3]

## Participants

Five focus groups participated in the study. Each included one GTT review team from five different sized hospitals in south-eastern Sweden. The teams had participated in an earlier study comparing reviews of the same set of records.[18] Team members were contacted by email requesting participation in focus group interviews concerning their experiences of using the GTT. All team members agreed to participate in the interviews. The 16 participants consisted of five physicians and eleven RNs. All had long experience of working in health care, and 3-5 years' experience of reviewing medical record (Table 2). Participants from the teams were part of their hospital's patient safety teams, and worked extensively with patient safety issues including the GTT on a hospital-wide level. Eleven of the 16 team members were educated in GTT reviewing by attending a one-day program and partaking yearly in a two-day regional meeting devoted to training and collaboration. The other five team members had been trained by their respective colleagues. Of the teams, four (I, II, III and V) had participated in a regional GTT-network for four years where issues including harm and preventability were discussed. Four of the hospitals are middle-sized with about 200 beds, and one is a university hospital with approximately 600 beds. All hospitals used electronic medical records.

**Table 2.** Team member characteristics.

| Team | Profession | Age/Gender | Experiences of Specialty (years) | Profession             | Working with GTT (years) | Formal education in GTT |
|------|------------|------------|----------------------------------|------------------------|--------------------------|-------------------------|
| I    | Physician  | 64M        | 30                               | Psychiatry             | 3                        | No                      |
|      | Nurse      | 60F        | 39                               | Midwife                | 4                        | Yes                     |
|      | Nurse      | 59F        | 37                               | Internal medicine care | 3                        | No                      |
|      | Nurse      | 63F        | 30                               | Psychiatric care       | 4                        | Yes                     |
| II   | Physician  | 54F        | 30                               | Anesthesiology         | 5                        | Yes                     |
|      | Nurse      | 39F        | 19                               | Intensive care         | 3                        | No                      |
|      | Nurse      | 38F        | 18                               | Intensive care         | 3                        | No                      |
| III  | Physician  | 64M        | 37                               | ENT (ear-nose-throat)  | 4                        | Yes                     |
|      | Nurse      | 44F        | 18                               | Emergency care         | 4                        | Yes                     |
|      | Nurse      | 63F        | 39                               | Orthopedic care        | 4                        | Yes                     |
| IV   | Physician  | 66M        | 40                               | Internal medicine      | 4                        | No                      |
|      | Nurse      | 53F        | 27                               | Internal medicine care | 4                        | Yes                     |
|      | Nurse      | 58F        | 36                               | Intensive care         | 4                        | Yes                     |
| V    | Physician  | 63M        | 35                               | Surgeon                | 4                        | Yes                     |
|      | Nurse      | 37F        | 13                               | Pediatric care         | 4                        | Yes                     |
|      | Nurse      | 58F        | 34                               | Midwife                | 4                        | Yes                     |

### Data collection

The interviews took place between January and March of 2011 at the five hospitals where the participants worked. Five 80 to 95-minute focus group interviews were conducted. One of the authors (K.S.) moderated all interviews, with an assistant moderator (G.N. or K.Å.). The moderator was responsible for facilitating the discussion and prompting team members to speak, while the assistant moderator recorded sessions and took notes. K.S. had worked with the GTT method for four years on a hospital level, while G.N. and K.Å. had experience of working with qualitative studies and focus groups. Besides taking notes they were to also ensure that the moderator's pre-understanding did not affect team members' responses. After

1  
2  
3 an opening question, aimed to make team members feel comfortable, an introductory question  
4  
5 was asked: What are your experiences of the strengths and weaknesses of the GTT method?  
6  
7 The introductory question was followed by transition questions; “Tell us how it was when you  
8  
9 started reviewing by using the GTT” and “How are you presently reviewing?” The purpose of  
10  
11 transition questions was to form a link between the introductory and key questions. The key  
12  
13 questions captured the major areas of concern. Examples of key questions were; “From your  
14  
15 experiences, which strengths/weaknesses do you find with the method in its entirety?” “What  
16  
17 are your experiences of the different triggers?” and “What is your opinion on the judgement  
18  
19 of preventability?” During the interviews, the moderator asked probing questions, e.g. “What  
20  
21 do you mean?” or “Can you explain a little further?” Towards the ends of the interviews the  
22  
23 moderator asked questions, e.g. if there was more to discuss, or if something needed further  
24  
25 clarification. The moderator also summarized the key points. All interviews were recorded  
26  
27 and transcribed verbatim. Immediately after the focus group interviews, the moderator and the  
28  
29 assistant moderator gave a debriefing of their first impressions and compared these  
30  
31 interpretations from those found in earlier focus groups. The transcribed interviews were  
32  
33 returned to the team members with the question of whether they felt that the text reflected  
34  
35 their interviews. All accepted the text.  
36  
37  
38  
39  
40  
41  
42

### 43 **Analysis of the interviews**

44  
45 Interviews were analysed according to Krueger and Casey to identify patterns and discover  
46  
47 relationships between ideas. Data analysis proceeded simultaneously with data collection until  
48  
49 no new information emerged. The text was coded and opinions with similar meanings were  
50  
51 grouped together until eight categories emerged. Comparisons were made throughout the  
52  
53 analysis between categories and the text as a whole.[20]  
54  
55  
56  
57  
58  
59  
60

1  
2  
3 Conformability, credibility and dependability are all concepts of trustworthiness.[23] To  
4  
5 validate the findings investigator triangulation was used. Transcripts were read and reread by  
6  
7 all researchers to gain a sense of content, sometimes returning to interview recordings to  
8  
9 become completely familiar with the data and comprehend its essential features. With the aim  
10  
11 of the study in mind researchers read the text and made notes and headings in the margins to  
12  
13 include all aspects of the content. The first author (KS) established categories based on  
14  
15 citations. To ensure conformability, co-authors discussed the categories, and changes were  
16  
17 made until consensus was reached. To increase credibility according to Krueger and  
18  
19 Casey,[20] at least three focus group interviews should be carried out. In this study, five focus  
20  
21 groups were conducted. A careful description of the sampling procedure and data analyses  
22  
23 was presented to ensure dependability. Each citation was given a number for data-reporting  
24  
25 purposes to show evidence of reporting across responses from the five teams (I–V).  
26  
27  
28  
29  
30

### 31 **Ethical considerations**

32  
33 All members of the GTT teams gave their individual informed consent to participate in the  
34  
35 study. Ethical permission was obtained from the Regional Ethical Board of Linköping  
36  
37 University, Sweden (study number 2010/399-32).  
38  
39  
40  
41  
42  
43  
44  
45  
46  
47  
48  
49  
50  
51  
52  
53  
54  
55  
56  
57  
58  
59  
60

## RESULTS

The categories identified were; *“Usefulness of the GTT”*, *“Application of the GTT”*, *“Triggers”*, *“Preventability of harm”*, *“Team design”*, *“Team tasks”*, *“Team members’ knowledge development ”* and *“Documentation”*. Each category is presented by its strengths and weaknesses.

### *Usefulness of the GTT*

#### **Strengths**

Team members found the method useful in identifying patient harm. An advantage was that the method, apart from being used in a random selection of records, could also be used by specific specialties, or for a subgroup of patients, i.e. for deceased patients.

*“It is a useful tool; it is relevant and it identifies harm. I feel that it is important. It feels that the tool can positively affect healthcare...” (II).*

#### **Weaknesses**

Even if all teams considered the method useful, they also mentioned that it was oriented mainly towards harm connected to actions undertaken by physicians. A nursing care perspective was missing and was requested.

*“One wishes it (the GTT) was more care oriented...lack of care can also harm patients” (IV).*

All teams talked about the method’s weakness in not capturing all failures, as omission is not part of the GTT.

*“There is no trigger for omission. When reading notes, one sometimes wonders why no one has reacted” (V).*

### *Application of the GTT*

#### **Strengths**

1  
2  
3 Most often RNs could easily make their assessments within 20 minutes, pointing out the time  
4  
5 limit as a strong point of the method.  
6

7 *“You quickly find what you need when you have figured out how to review” (I).*  
8

9 While some RNs felt it better to review medical records outside their specialties, others found  
10  
11 it easier to examine records from their own speciality.  
12

13 *“It is easier to understand why certain things were done when you review your own area”*  
14  
15 *(IV).*  
16

### 17 **Weaknesses**

18  
19 The teams gave careful reports on how they previously performed audits, and all mentioned  
20  
21 that they used the method as described in the handbook. Still, all teams made changes in the  
22  
23 review process. For example, in the manual it states that the two RNs in the team should  
24  
25 review the same records separately and then reach a consensus. Instead, all RNs reported  
26  
27 dividing the charts into two sets and reading them separately.  
28  
29

30  
31 *“It is good to sit together and talk, but we no longer review the same records” (V).*  
32  
33

34 The RNs sometimes thought it hard to restrict themselves to looking only for triggers and  
35  
36 associated possible harm as indicated in the chart, when they found other striking things in  
37  
38 patient records. This led them to use the method for purposes other than those originally  
39  
40 intended. In such cases they chose to mark these findings on the GTT chart and discuss them  
41  
42 with the team.  
43

44  
45 *“When I find things that make me react I include them. They may be important in other*  
46  
47 *contexts” (I).*  
48

49 Even if the time limit was not considered a major problem, there were still situations when the  
50  
51 time limit was a problem, e.g. where patients had experienced a long period of care. RNs  
52  
53 mentioned that in some cases the time limit was exceeded.  
54

55  
56 *“We read the records very carefully; and 20 minutes was in no way enough!” (IV).*  
57  
58  
59  
60

1  
2  
3 When reviewing records from their own area there was a risk for the RNs becoming  
4  
5 insensible, regarding patient harm as something that just happens.  
6

7 *“You are more forgiving in your own area, you become blind. Therefore, it is good that*  
8  
9 *reviewers are from different clinics” (III).*  
10

### 11 12 13 14 **Triggers**

#### 15 16 **Strengths**

17  
18 The teams found the triggers’ intuitive in a sense that they were easy to keep in mind covering  
19  
20 wide areas and facilitating reviewing.  
21

22 *“The triggers are good and useful” (I).*  
23

#### 24 25 **Weaknesses**

26  
27 Even if all teams were satisfied with the GTT method, they found that some triggers were  
28  
29 imprecise, and some never used.  
30

31 *“The trigger “treatment” is vague and can always or never be used” (II).*  
32

33  
34 The team members’ affiliations influenced to some extent their statements about a need for  
35  
36 additional triggers. All teams mentioned that a trigger for “failure or measures not been  
37  
38 performed as intended” was missing. The teams also said that several nursing care triggers  
39  
40 were missing and should be added.  
41

42 *“Triggers evaluating harm in the areas of nutrition, elimination, pain and oral hygiene are*  
43  
44 *all missing” (IV).*  
45

46  
47 One team mentioned that bad behaviour by health care providers was not brought up.  
48

49 *“The method is not designed for assessing personnel behaviour from a patient perspective”*  
50  
51 *(I).*  
52

### 53 54 55 56 **Preventability of harm** 57 58 59 60

**Strengths**

The teams mentioned that development of health care processes and the work of patient safety required new thinking and that the, for Swedish conditions added “judgment of preventability”, helped them in achieving this view. The question “Could this have been done differently?” in the sentence “Could we have prevented this from happening?” provided an opportunity to consider preventability from more than one perspective.

*“To gain improvement you must consider many findings as avoidable. It may be avoidable if things are done differently” (III).*

**Weaknesses**

When “judgment of preventability” came up for discussion, all teams considered the concept as too subjective. They felt there would be as many answers as the number of people asked.

*“Determining harm to the patient is easy but the judgment of preventability is difficult” (I).*

**Team composition****Strengths**

The teams found strength in their interdisciplinary representation of healthcare specialities. Several personnel categories to consider patient care from different perspectives were considered a prerequisite for the implementation of healthcare improvements.

*“To gain good results, everyone’s efforts are necessary and important; we see things differently” (II).*

**Weaknesses**

A sufficient number of reviewers were considered important for avoiding problems in the event of reviewers dropping out. Too few reviewers led to team vulnerability due to the risk of team members being unavailable.

*“At least four reviewers are required” (I).*



1  
2  
3 It was also important for team members to continue reviewing for long periods of time.

4  
5 *“You probably need, in any case, at least some years’ of experience of reviewing” (IV).*

6  
7 However, the team also saw a danger in remaining too long as a reviewer, due to possible  
8  
9 increasing tolerance toward AEs or substandard care.

10  
11  
12 *“What I’m wondering about is that there is a risk of becoming less careful, to put things aside*  
13  
14 *thinking that this is nothing” (II).*

### 15 16 17 18 **Tasks**

### 19 20 21 **Strengths**

22  
23 The interdisciplinary composition of the teams made it easier to take up reviewed events for  
24  
25 discussion, not only within the team but also with others. Physicians discussed with other  
26  
27 physicians, while RNs discussed with colleagues from their own departments.

28  
29  
30 *”After reviewing I discussed findings with my colleagues” (IV).*

### 31 32 33 **Weaknesses**

34  
35 Teams sought intensified discussions to increase the work of quality improvement of patient  
36  
37 safety. They perceived their most important task was to convey results back to their clinics.

38  
39 This was difficult when randomly reviewing records from an entire hospital.

40  
41 *“Our ambition is to go to the different clinics and tell them directly of our concerns for their*  
42  
43 *specific problems” (I).*

44  
45 Even if the teams would have liked to provide feedback to the clinics, they were concerned  
46  
47 about how their findings would be received.

48  
49  
50 *“We do not want them to look at us as police officers, but wish to review and return to the*  
51  
52 *clinics with our findings with the aim of improving things” (I).*

### 53 54 55 56 **Team member’s knowledge development**

### Strengths

All teams had used the GTT on a monthly basis from three to five years for their hospital's patient safety work and were accustomed to reviewing patient records from the perspective of various medical specialities. Team members believed they had developed their skills gradually. They had also gained a greater understanding of the health care system during their time on the GTT team. They had increased their skills of how to and how not to document through the reading of patient records.

*"You learn a lot by reading others' notes on how to better carry out documentation" (IV).*

They also mentioned they could better observe care and harm from the patient's perspective.

*"It (GTT) requires time to be able to say that from the patient's perspective harm has occurred" (II).*

### Documentation

#### Strengths

The teams considered RNs' more accurate and precise in their documentation than physicians; and it was the RNs' notes that revealed the greatest number of AEs and helped the most to determine levels of harm. Nursing care documentation was richer in its comments about the patients' conditions during hospital stay.

*"RNs' notes are much more detailed, concerning, for example, urinary infections and how the patient really feels" (V).*

#### Weaknesses

Although the teams felt they had identified patient harm through the RNs' documentation, they considered documentation generally poor. They described sparse and duplicated documentation. The teams mentioned that minor incidents during hospital stay, causing minor patient harm, were not mentioned at all in the discharge letter.

1  
2  
3 *“There is a considerable amount of duplicated documentation” (I).*

4  
5 *“Medical records summaries are often written after the care episode and are very sparse,*  
6  
7 *small incidents aren’t mentioned at all” (V).*

8  
9  
10 The teams felt they had to look through a large body of text that sometimes made it difficult  
11  
12 to orient themselves in the patients’ medical records. They also felt that some of the notes had  
13  
14 no real impact on patient care, which influenced their overview of the patients’ medical  
15  
16 records. Sometimes it was hard for team members to understand how patient care had actually  
17  
18 been conducted, making review more difficult.

19  
20  
21 *“There is so much text that it becomes unmanageable, you get no clear picture of the patient’s*  
22  
23 *condition” (III).*

24  
25 *“One sometimes wonders how care has been carried out” (I).*  
26  
27

## 28 29 **DISCUSSION**

30  
31 To the best of our knowledge, this study is the first investigation of how the GTT method is  
32  
33 experienced and implemented from the reviewing team’s perspective. The teams found the  
34  
35 GTT method useful whereby it identified patient harm and could be used for different  
36  
37 specialties. They had gradually modified the original review method to suit a personal  
38  
39 context, e.g. time dedicated for reviewing. The method was found subjective in its estimation  
40  
41 of the, for Swedish conditions, added judgment of preventability. A nursing care perspective  
42  
43 was missed and should be added, and insufficient documentation was a barrier to medical  
44  
45 patient record reviewing.  
46  
47  
48

49  
50  
51 The teams made small and gradual changes in the methodology, which may have contributed  
52  
53 to large differences in the assessments over time. They mentioned having used the method as  
54  
55 described in the Swedish manual,[9], based on the original IHI method.[6] However,  
56  
57  
58  
59  
60

1  
2  
3 interviews revealed how teams had deviate from the original method by using it somewhat  
4 differently, occasionally even for other purposes. For example, the RNs did not review the  
5 same charts and reach a consensus about their findings as intended in the manual. Instead,  
6 they divided the charts into two parts and reviewed half of them each. Some teams, besides  
7 random admissions, also reviewed the records of all hospital deaths. Another example was  
8 how one team sometimes interpreted the presence of triggers as equal to the occurrence of  
9 harm. From their point of view the triggers indicated substandard care. If treatment had been  
10 given according to standard, the patient would not have needed e.g. to be readmitted within 30  
11 days. All teams missed a trigger for “measures not performed according to standard care”,  
12 indicating that the teams could have mixed quality measures and harm to patients. Another  
13 possibility is that the teams have had The Swedish National Board of Health and Welfare’s  
14 definition of AEs in their mind instead of the definition of harm from the GTT manual,  
15 restricting harm to physical injuries. By the Swedish National Board of Health and Welfare  
16 harm is defined as: “Any suffering, discomfort, bodily or mental injury, illness or death  
17 caused by healthcare and which is not an inevitable consequence of the patient's condition or  
18 an expected effect of the treatment received by the patient because of her/his condition.[24]  
19  
20  
21  
22  
23  
24  
25  
26  
27  
28  
29  
30  
31  
32  
33  
34  
35  
36  
37  
38  
39  
40

41 The teams had also made another deviation from the original method; the time limit of 20  
42 minutes was sometimes exceeded, as the records were read carefully when the RNs did not  
43 always restrict themselves to look for triggers alone. A recent Danish study showed that the  
44 method was initially interpreted differently at different hospitals.[25] Small changes in  
45 methodology and a gradual development of skills could explain inter-rater disagreement  
46 between teams. Another reason for disagreement between teams could be the teams obtaining  
47 of a patient perspective along with different team composition regarding interdisciplinary  
48 representation. However, it is important to remember that several studies have shown the  
49  
50  
51  
52  
53  
54  
55  
56  
57  
58  
59  
60

1  
2  
3 superiority of record reviews in detecting and categorising AEs.[1,7,8,26-29] This was also  
4  
5 the team members' view, considering that the most important function of the GTT method  
6  
7 was the identification of AEs. In line with Brandrud,[30] they developed new knowledge that  
8  
9 appeared to be useful locally.  
10

11  
12  
13  
14 Even if it was also considered important to provide feedback from GTT reviews to RNs and  
15  
16 physicians on the wards, no team wanted to be regarded as controllers. They would rather  
17  
18 look at harm on a systematic level as did Resar,[31] who mentioned that focus on AEs targets  
19  
20 the system rather than the individual, and can lead to the exploration of methodology to  
21  
22 improve or enhance clinical outcomes. The advantages of the GTT method were that it could  
23  
24 be adapted to specialties, subgroups of patients or health care processes. Safety problems can  
25  
26 be identified by medical record review leading to specific measures to prevent future harm.  
27  
28  
29

30  
31  
32 The teams had views concerning triggers that should be added or removed. They mentioned  
33  
34 that the method included triggers never used, and those that could be used at all times, without  
35  
36 necessarily identifying AEs. The teams missed nursing care triggers, such as patient pain,  
37  
38 nutrition and elimination. They also saw a need for clinic-specific triggers. There are activity-  
39  
40 specific trigger versions for ambulatory care,[32] intensive care,[31] surgical care,[33]  
41  
42 neonatal care[29] and primary care[26]. Creating new triggers requires reflection. We agree  
43  
44 with Kaafarani,[32] on the importance of considering clinical relevance, utility and feasibility  
45  
46 of implementation when designing triggers.  
47  
48  
49

50  
51  
52 The teams found remarkably insufficient documentation and mentioned this as a potential  
53  
54 problem for becoming more proactive in patient safety work. As the GTT method is based  
55  
56 solely on findings in patient records the teams highlighted the lack of documentation, which  
57  
58  
59  
60

1  
2  
3 casted doubt on how care had been conducted. This is in line with other studies.[34-36]  
4  
5 Weingart,[36] mentioned that many AEs are not recorded in the medical charts, attributable to  
6  
7 variable standards of documentation, clinical unawareness or oversight, and concern about  
8  
9 liability exposure. In our study team members mentioned finding it difficult to gain an  
10  
11 overview of the patient's illness. The same result has been shown by Stevenson and  
12  
13 Nilsson.[35] They found that essential information such as vital signs was difficult to enter  
14  
15 and locate in electronic records. It was also unclear where specific information such as blood  
16  
17 pressure and pulse should be documented.  
18  
19

20  
21  
22  
23 The team members gained greater understanding of the structure of healthcare, and also  
24  
25 looked upon AEs more from a patient perspective. The team's belief that their most important  
26  
27 task was to bring back results to the clinics can point at an unclear structure for the team's  
28  
29 task. It is of importance to have a clear structure for the patient safety work at the hospital  
30  
31 level including clarity for the teams, putting their work into the right perspective e.g. that  
32  
33 increased patient safety work is a lengthy process.  
34  
35

36  
37  
38 Being a GTT team member allows the participant new possibilities for collaboration, and a  
39  
40 better chance to be included in a patient safety context with accountability for tracking and  
41  
42 making changes in healthcare. This is in accordance with Brandrud,[30] who found three  
43  
44 success factors for continuous quality improvement; continuous and reliable information,  
45  
46 involvement by all, and an infrastructure based on improvements in knowledge.  
47  
48  
49

50  
51  
52 Focus group interviews were chosen as they encourage interaction between participants. The  
53  
54 team members in our study had worked together as teams for several years. Since we wanted  
55  
56 to achieve a picture of positive and negative experiences of working with the GTT in clinical  
57  
58  
59  
60

1  
2  
3 practice, we tried to create an interview situation as comfortable as possible for the team  
4  
5 members. For this reason, we chose to keep the teams in their initial compositions in the focus  
6  
7 groups.  
8  
9

10  
11 One limit may be that this study was carried out in Sweden where preventability has been  
12  
13 added to the GTT method. Judgment about this was considered as subjective by the teams.  
14  
15 However, apart from the addition of preventability, the Swedish GTT method does not differ  
16  
17 from the original GTT method used in many other countries. The analysis is based on  
18  
19 propositions from the teams, but we do not know how well they reflect other teams' opinions  
20  
21 from other hospitals or under other circumstances. Other GTT teams will probably have  
22  
23 similar experiences and be able to refer to these interpretations, and hopefully develop their  
24  
25 work of patient safety. Further limitations are that our study lacks questions related to how the  
26  
27 core measurements of the GTT protocol, e.g. number of AEs per 100 admissions were  
28  
29 analyzed and presented and in addition we did not pick up the aspect with statistical process  
30  
31 control in the interviews.  
32  
33  
34  
35  
36  
37

### 38 **Conclusions**

39  
40 The GTT method was found useful and important with triggers facilitating reviewing,  
41  
42 although documentation was generally poor. The most important and difficult task as a review  
43  
44 team was to report AEs to the involved clinics. The teams gradually made small changes in  
45  
46 the methodology, which together with gradual expertise and different team composition may  
47  
48 contribute to differences between teams in the assessments over time. Despite this, we  
49  
50 conclude that the GTT method has the strength to identify AEs and could be used in  
51  
52 subgroups of patients or in different specialties.  
53  
54  
55  
56  
57  
58  
59  
60

**Acknowledgements**

The authors wish to thank the teams for their efforts.

**Funding statement**

This work was supported by FORSS – the research council of southeast Sweden and the County Council of Kalmar for KS. FORSS has neither been involved in any part of the study, nor in writing the manuscript or in the decision to submit the manuscript for publication.

**Competing interest**

None of the authors have competing interests.

**Contributors**

Kristina Schildmeijer's responsibility; study design, acquisition of data, analysis, interpretation of data, drafting the article and intellectual content.

Lena Nilsson's responsibility; study design, analysis, interpretation of data, drafting the article and intellectual content.

Kristofer Årestedt's responsibility; study design, analysis, interpretation of data, drafting the article and intellectual content.

Joep Perk's responsibility; study design, and intellectual content.

Gunilla Nilsson's responsibility; study design, acquisition of data, analysis, interpretation of data, drafting the article and intellectual content.

**Data sharing**

No additional data available.



**REFERENCES**

1. Landrigan C, Parry G, Bones C, et al. Temporal trends in rates of patient harm resulting from medical care. *N Eng J Med*. 2010;**363**(22):2124-34.
2. Schioler T, Lipczak H, Pedersen BL, et al. Incidence of adverse events in hospitals. A retrospective study of medical records. *Ugeskr Laeger*. 2001;**163**(39):5370-8.
3. Soop M, Fryksmark U, Koster M, et al. The incidence of adverse events in Swedish hospitals: a retrospective medical record review study. *Int J Qual Health Care*. 2009;**21**(4):285-91.
4. Vincent C, Neale G, Woloshynowych M. Adverse events in British hospitals: preliminary retrospective record review. *BMJ*. 2001;**322**(7285):517-9.
5. Wilson R, Runciman W, Gibberd R, et al. The quality in Australian health care study. *Med J Aust*. 1995;**163**(9):458-71.
6. Griffin F, Resar R. IHI Global Trigger Tool for measuring adverse events. (Second Ed). Cambridge, Massachusetts: Institute for Healthcare Improvement, 2009.
7. Classen D, Resar R, Griffin F, et al. "Global Trigger Tool" shows that adverse events in hospitals may be ten times greater than previously measured. *Health Affairs*. 2011;**30**(4):581-9.
8. Good V, Saldana M, Gilder R, et al. Large-scale deployment of the Global Trigger Tool across a large hospital system: refinements for the characterisation of adverse events to support patient safety learning opportunities. *Qual Saf Health Care*. 2011;**20**(1):25-30.
9. Institute for Healthcare Improvement. Structured record review to identify and measure the incidence of injuries in health care by the method described Global Trigger Tool: Guide to patient safety work [Swe: Strukturerad journalgranskning för att identifiera och mäta förekomst av skador i vården enligt metoden Global Trigger Tool : Handbok för patientsäkerhetsarbete]. Institute for Healthcare Improvement Innovation 2007 (A Swedish translated and adjusted version 2008). Stockholm: Kommentus; 2008.
10. The Danish safer hospital programme. (Second Ed). Safety DsfP; 2012. <http://www.sikkerpatient.dk/in-english/the-danish-safer-hospital-programme.aspx> (accessed 18 June 2013).
11. Canadian Patient Safety Institute; 2012. <http://www.patientsafetyinstitute.ca/English/Pages/default.aspx> (accessed 18 June 2013).
12. NMOH. In safe hands. Norwegian Knowledge Centre for the Health Services; 2012. <http://www.pasientsikkerhetskampanjen.no/no/I+trygge+hender/In+English/In+Safe+Hands%3A+the+Norwegian+patient+safety+campaign+2011+-+2013.451.cms> (accessed 18 June 2013).
13. Patient safety first. (Second Ed). Agency NPS; 2012.

1  
2  
3 <http://www.patientsafetyfirst.nhs.uk/Content.aspx?path=/About-the-campaign/> (accessed 18  
4 June 2013).

5  
6 14. Naessens JM, Campbell C, Huddleston J, et al. A comparison of hospital adverse events  
7 identified by three widely used detection methods. *Int J Qual Health Care*. 2009;**21**(4):301-7.  
8

9  
10 15. Forster AJ, O'Rourke K, Shojania KG, et al. Combining ratings from multiple physician  
11 reviewers helped to overcome the uncertainty associated with adverse event classification. *J*  
12 *Clin Epidemiol*. 2007;**60**(9):892-901.  
13

14 16. Hofer TP, Bernstein SJ, DeMonner S, et al. Discussion between reviewers does not  
15 improve reliability of peer review of hospital quality. *Med Care*. 2000;**38**(2):152-61.  
16

17 17. Mattsson T, Lehmann Knudsen J, et al. Assessment of the global trigger tool to measure,  
18 monitor and evaluate patient safety in cancer patients: reliability concerns are raised. *Qual Saf*  
19 *Health Care*. 2013;**0**:1-9.  
20

21 18. Schildmeijer K, Nilsson L, Arestedt K, et al. Assessment of adverse events in medical  
22 care: lack of consistency between experienced teams using the Global Trigger Tool. *BMJ*  
23 *Qual Saf*. 2012;**21**(4):307-14.  
24

25 19. Sharek PJ, Parry G, Goldmann D, et al. Performance characteristics of a methodology to  
26 quantify adverse events over time in hospitalized patients. *Health Serv Res*. 2011;**46**(2):654-  
27 78.  
28

29 20. Krueger RA, Casey MA. *Focus Groups - A Practical Guide for Applied Research*. (Fourth  
30 Ed). Washington: SAGE; 2009.  
31

32 21. Classen DC, Lloyd RC, Provost L, et al. Development and Evaluation of the Institute for  
33 Healthcare Improvement Global Trigger Tool. *J Patient Saf*. 2008;**4**(3):169.  
34

35 22. Resar R, Rozich J, Classen D. Methodology and rationale for the measurement of harm  
36 with trigger tools. *Qual Saf Health Care*. 2003;**12**(Suppl 2):39-45.  
37

38 23. Patton MQ. *Qualitative Research & Evaluation Methods* (Third Ed). Washington: SAGE  
39 Publications Inc.; 2001.  
40

41 24. National Board of Health and Welfare. Patient Safety and Patient Safety Improvement. An  
42 Overview [Patientsäkerhet och patientsäkerhetsarbete. En översikt]. Stockholm: National  
43 Board of Health and Welfare. 2004.  
44

45 25. von Plessen C, Kodal A, Anhoj J. Experiences with global trigger tool reviews in five  
46 Danish hospitals: an implementation study. *BMJ Open*. 2012;**2**:1-8.  
47

48 26. de Wet C, Bowie P. The preliminary development and testing of a global trigger tool to  
49 detect error and patient harm in primary-care records. *Postgrad Med J*. 2009;**85**:176-80.  
50

51 27. Nilsson L, Pihl A, Tagsjo M, et al. Adverse events are common on the intensive care unit:  
52 results from a structured record review. *Acta Anaesthesiol Scand*. 2012;**56**(8):959-65.  
53  
54  
55  
56  
57  
58  
59  
60

- 1  
2  
3 28. Rozich JD, Haraden CR, Resar RK. Adverse drug event trigger tool: a practical  
4 methodology for measuring medication related harm. *Qual Saf Health Care*. 2003;**12**(3):194-  
5 200.  
6  
7 29. Sharek P, Horbar J, Mason W, et al. Adverse events in the neonatal intensive care unit:  
8 development, testing, and findings of an NICU-focused trigger tool to identify harm in North  
9 American NICUs. *Pediatrics*. 2006;**118**(4):1332-40.  
10  
11 30. Brandrud A, Schreiner A, Hjortdahl P, et al. Three success factors for continual  
12 improvement in healthcare: an analysis of the reports of improvement team members. *BMJ*  
13 *Qual Saf*. 2011;**20**(3):251-9.  
14  
15 31. Resar R, Rozich J, Simmonds T, et al. A trigger tool to identify adverse events in the  
16 intensive care unit. *Jt Comm J Qual Patient Saf*. 2006;**32**(10):585-90.  
17  
18 32. Kaafarani H, Rosen A, Nebeker J, et al. Development of trigger tools for surveillance of  
19 adverse events in ambulatory surgery. *Qual Saf Health Care*. 2010;**19**(5):425-9.  
20  
21 33. Griffin FA, Classen DC. Detection of adverse events in surgical patients using the Trigger  
22 Tool approach. *Qual Saf Health Care*. 2008;**17**(4):253-8.  
23  
24 34. Cheevakasemsook A, Chapman Y, Francis K, et al. The study of nursing documentation  
25 complexities. *Int J Nurs Pract*. 2006;**12**(6):366-74.  
26  
27 35. Stevenson J, Nilsson G. Nurses' perceptions of an electronic patient record from a patient  
28 safety perspective: a qualitative study. *J Adv Nurs*. 2012;**68**(3):667-76.  
29  
30 36. Weingart S, Pagovich O, Sands D, et al. What can hospitalized patients tell us about  
31 adverse events? Learning from patient-reported incidents. *J Gen Intern Med*. 2005;**20**(9):830-  
32 6.  
33  
34  
35  
36  
37  
38  
39  
40  
41  
42  
43  
44  
45  
46  
47  
48  
49  
50  
51  
52  
53  
54  
55  
56  
57  
58  
59  
60

**Title:** Strengths and weaknesses of working with the Global Trigger Tool method for retrospective record review - Focus group interviews with team members

Kristina Schildmeijer, RN, PhD student<sup>1</sup>

Lena Nilsson, MD, PhD<sup>2</sup>

Joep Perk, Professor<sup>1</sup>

Kristofer Årestedt, RN, PhD<sup>1,3,4</sup>

Gunilla Nilsson, RN, Assoc Prof<sup>1</sup>

- 1) School of Health and Caring Sciences, Faculty of Health and Life Sciences, Linnaeus University, S-391 82 Kalmar, Sweden
- 2) Department of Medicine and Health Sciences, Linköping University, Department of Anesthesia and Intensive Care, County Council of Östergötland, S-581 85 Linköping, Sweden
- 3) Division of Nursing Science, Department of Medical and Health Sciences, Linköping University, S-581 83 Linköping, Sweden
- 4) Palliative Research Centre, Ersta Sköndal University College and Ersta hospital, S-100 61 Stockholm, Sweden

Correspondence to:

Kristina Schildmeijer

Tel +46-480-44 67 62

Fax + 46-480-44 60 32

E-mail address: [kristina.schildmeijer@lnu.se](mailto:kristina.schildmeijer@lnu.se)

**Keywords:** Global Trigger Tool, record review, adverse events, patient safety, focus groups.

**Word count:** 4684 words excluding title page, abstract, references, figures and tables

## ABSTRACT

**Objectives:** The aim was to describe the strengths and weaknesses, from team member perspectives, of working with the Global Trigger Tool method of retrospective record review to identify adverse events causing patient harm.

**Design:** A qualitative, descriptive approach with focus group interviews using content analysis.

**Setting:** Five Swedish hospitals in 2011.

**Participants:** Five Global Trigger Tool teams, with 5 physicians and 11 registered nurses.

**Intervention:** Five focus group interviews were carried out with the five teams. Interviews were taped and transcribed verbatim.

**Results:** Eight categories emerged relating to the strengths and weaknesses of the Global Trigger Tool method. The categories found were; *“Usefulness of the GTT”*, *“Application of the GTT”*, *“Triggers”*, *“Preventability of harm”*, *“Team composition”*, *“Team tasks”*, *“Team members’ knowledge development”* and *“Documentation”*. Gradually, changes in the methodology were made by the teams, e.g. the teams reported how the registered nurses divided up the charts into two sets, each being read respectively. The teams described the method as important and well-functioning. The most important, but also the most difficult, was the task of bringing the results back to the clinic. The teams found it easier to discuss findings at their own clinics.

**Conclusions:** The GTT method functions well for identifying adverse events and is strengthened by its adaptability to different specialties. However, small, gradual methodological changes together with continually developed expertise and adaption to looking at harm from a patient perspective may contribute to large differences in assessment over time.

## Article summary

### Article focus

The Global Trigger Tool (GTT) method for retrospective record review is a valuable tool for identifying adverse events causing patient harm, but has been criticized for subjectivity due to its being based upon the personal judgment of team members.

To improve record reviewing as a useful tool in patient safety work it is essential to gain a deeper understanding of the reviewing teams' experiences of working with the GTT method.

The article focuses on strengths and weaknesses from a team member perspective of working with the GTT method.

### Key messages

The GTT method is a useful, relevant and important tool in patient safety work.

The teams made changes in the review process over time.

GTT can be adapted to various specialties or patient groups (e.g. patients in intensive care).

Being a GTT team member provides participant with an increased understanding of the healthcare system, as well as accountability for tracking and making improvements in healthcare.

### Strengths and limitations of the study

Experienced reviewers from different sized hospitals were interviewed. All team members took the opportunity to speak as a team.

The analysis was based on propositions from the five focus group teams. However, it was not clear whether their experiences of working with the GTT method reflected the opinions of teams from other hospitals *or under other circumstances*. This needs to be verified through further studies.

## Background

Adverse events (AEs) are common in healthcare. European studies report a prevalence of patient harm of 9-12%. [1-4] AEs causing patient harm can be identified through retrospective patient record reviews. [3,5] The Global Trigger Tool (GTT), developed by the Institute for Healthcare Improvement (IHI), [6] is one such method, primarily intended for following the level of AEs on a hospital level, that has been increasingly used. [7,8] It identifies AEs causing patient harm caused by medical treatment, not the underlying medical condition of the patient. In GTT 20 medical records from randomly chosen hospital admissions are retrospectively reviewed every month by experienced teams often consisting of two registered nurses (RNs) and one physician. An advantage of the GTT is the measurement of the rate of AEs over time within an organisation, and the use of GTT for evaluating and measuring patient safety has been promoted in several countries. [9-13] GTT has been shown superior to other incident-reporting systems in identifying AEs. [7,14] On the other hand, the methodology of record reviews, including GTT, has been criticized for not being sufficiently robust, whereby judgments have been found to differ between reviewing teams. [15-18] At moderate inter-rater agreement between review teams in oncological care, [17-19] a Blant-Altman analysis of the GTT method showed large random errors when comparing review teams. [17] This reduces its ability to track a true change in the level of patient harm.

In order to gain a nuanced view of record review as a tool for evaluating patient safety work, we find it important to gain a deeper understanding of the experiences from reviewing teams working with the GTT method. This knowledge could provide us with a better understanding of the strengths and weaknesses of the GTT method, which might help us to better understand

1  
2  
3 causes of disagreement between teams, and provide valuable knowledge for a broader view of  
4  
5 the GTT method and its role in patient safety work.  
6  
7

### 8 9 **Objective**

10 The aim was to describe strengths and weaknesses, from the perspective of team members  
11  
12 working with the Global Trigger Tool method.  
13  
14

### 15 16 17 18 **METHOD**

19 The study was conducted using a qualitative, descriptive approach with focus group  
20  
21 interviews as described and analyzed by Krueger & Casey.[20]  
22  
23  
24

#### 25 26 27 **The Global Trigger Tool method**

28 The GTT method is based on reviewing medical records from randomly selected admissions  
29  
30 in a structured way in an effort to identify AEs by searching for “triggers”. It is designed for  
31  
32 utilizing small samples over time from a hospital or a healthcare organization.[21,22] A  
33  
34 “trigger” may indicate that an AE has occurred, e.g. the trigger “patient fall”, indicating for  
35  
36 instance a side effect of drugs that can cause patient harm from a fall. Teams consisting of one  
37  
38 physician and two RNs review a patient’s medical records. In the first stage, the RNs review  
39  
40 independently noting “triggers” and associated AEs on a chart. The time limit is set at 20  
41  
42 minutes. The nurses then discuss their findings, and after having reached a consensus,  
43  
44 complete a new chart together. Charts with a potential AE are forwarded to the physician. In  
45  
46 stage two, the physician determines if an AE has occurred and, if so, the level of harm. The  
47  
48 Swedish GTT version is modified for Swedish conditions, listing 53 triggers rather than 54 as  
49  
50 in the original GTT method.[6] It also contains an additional item referred to as  
51  
52 “preventability”. Preventability is graded on a scale from 1-6, with 1 being no real evidence  
53  
54  
55  
56  
57  
58  
59  
60



for preventability and 6 being completely secure evidence for preventability. Preventability for each AE is judged by the physicians.[3,9] (Table 1)

**Table 1.** Description of preventability scale.

| Preventability scale |                                                         |
|----------------------|---------------------------------------------------------|
| 1                    | No real evidence for preventability                     |
| 2                    | Weak to small evidence for preventability               |
| 3                    | Preventability less likely than 50 percent, but close   |
| 4                    | Preventability more probable than 50 percent, but close |
| 5                    | Strong evidence for preventability                      |
| 6                    | Completely secure evidence for preventability           |

Classes 1-3 are considered non preventable harm.  
Classes 4-6 are considered preventable harm.[3]

## Participants

Five focus groups participated in the study. Each included one GTT review team from five different sized hospitals in south-eastern Sweden. The teams had participated in an earlier study comparing reviews of the same set of records.[18] Team members were contacted by email requesting participation in focus group interviews concerning their experiences of using the GTT. All team members agreed to participate in the interviews. The 16 participants consisted of five physicians and eleven RNs. All had long experience of working in health care, and 3-5 years' experience of reviewing medical record (Table 2). Participants from the teams were part of their hospital's patient safety teams, and worked extensively with patient safety issues including the GTT on a hospital-wide level. Eleven of the 16 team members were educated in GTT reviewing by attending a one-day program and partaking yearly in a two-day regional meeting devoted to training and collaboration. The other five team members had been trained by their respective colleagues. Of the teams, four (I, II, III and V) had participated in a regional GTT-network for four years where issues including harm and preventability were discussed. Four of the hospitals are middle-sized with about 200 beds, and one is a university hospital with approximately 600 beds. All hospitals used electronic medical records.

**Table 2.** Team member characteristics.

| Team | Profession | Age/Gender | Experiences of Specialty (years) | Profession             | Working with GTT (years) | Formal education in GTT |
|------|------------|------------|----------------------------------|------------------------|--------------------------|-------------------------|
| I    | Physician  | 64M        | 30                               | Psychiatry             | 3                        | No                      |
|      | Nurse      | 60F        | 39                               | Midwife                | 4                        | Yes                     |
|      | Nurse      | 59F        | 37                               | Internal medicine care | 3                        | No                      |
|      | Nurse      | 63F        | 30                               | Psychiatric care       | 4                        | Yes                     |
| II   | Physician  | 54F        | 30                               | Anesthesiology         | 5                        | Yes                     |
|      | Nurse      | 39F        | 19                               | Intensive care         | 3                        | No                      |
|      | Nurse      | 38F        | 18                               | Intensive care         | 3                        | No                      |
| III  | Physician  | 64M        | 37                               | ENT (ear-nose-throat)  | 4                        | Yes                     |
|      | Nurse      | 44F        | 18                               | Emergency care         | 4                        | Yes                     |
|      | Nurse      | 63F        | 39                               | Orthopedic care        | 4                        | Yes                     |
| IV   | Physician  | 66M        | 40                               | Internal medicine      | 4                        | No                      |
|      | Nurse      | 53F        | 27                               | Internal medicine care | 4                        | Yes                     |
|      | Nurse      | 58F        | 36                               | Intensive care         | 4                        | Yes                     |
| V    | Physician  | 63M        | 35                               | Surgeon                | 4                        | Yes                     |
|      | Nurse      | 37F        | 13                               | Pediatric care         | 4                        | Yes                     |
|      | Nurse      | 58F        | 34                               | Midwife                | 4                        | Yes                     |

### Data collection

The interviews took place between January and March of 2011 at the five hospitals where the participants worked. Five 80 to 95-minute focus group interviews were conducted. One of the authors (K.S.) moderated all interviews, with an assistant moderator (G.N. or K.Å.). The moderator was responsible for facilitating the discussion and prompting team members to speak, while the assistant moderator recorded sessions and took notes. K.S. had worked with the GTT method for four years on a hospital level, while G.N. and K.Å. had experience of working with qualitative studies and focus groups. Besides taking notes they were to also ensure that the moderator's pre-understanding did not affect team members' responses. After

1  
2  
3 an opening question, aimed to make team members feel comfortable, an introductory question  
4 was asked: What are your experiences of the strengths and weaknesses of the GTT method?  
5  
6 The introductory question was followed by transition questions; “Tell us how it was when you  
7 started reviewing by using the GTT” and “How are you presently reviewing?” The purpose of  
8 transition questions was to form a link between the introductory and key questions. The key  
9 questions captured the major areas of concern. Examples of key questions were; “From your  
10 experiences, which strengths/weaknesses do you find with the method in its entirety?” “What  
11 are your experiences of the different triggers?” and “What is your opinion on the judgement  
12 of preventability?” During the interviews, the moderator asked probing questions, e.g. “What  
13 do you mean?” or “Can you explain a little further?” Towards the ends of the interviews the  
14 moderator asked questions, e.g. if there was more to discuss, or if something needed further  
15 clarification. The moderator also summarized the key points. All interviews were recorded  
16 and transcribed verbatim. Immediately after the focus group interviews, the moderator and the  
17 assistant moderator gave a debriefing of their first impressions and compared these  
18 interpretations from those found in earlier focus groups. The transcribed interviews were  
19 returned to the team members with the question of whether they felt that the text reflected  
20 their interviews. All accepted the text.  
21  
22  
23  
24  
25  
26  
27  
28  
29  
30  
31  
32  
33  
34  
35  
36  
37  
38  
39  
40  
41  
42

### 43 **Analysis of the interviews**

44  
45 Interviews were analysed according to Krueger and Casey to identify patterns and discover  
46 relationships between ideas. Data analysis proceeded simultaneously with data collection until  
47 no new information emerged. The text was coded and opinions with similar meanings were  
48 grouped together until eight categories emerged. Comparisons were made throughout the  
49 analysis between categories and the text as a whole.[20]  
50  
51  
52  
53  
54  
55  
56  
57  
58  
59  
60

1  
2  
3 Conformability, credibility and dependability are all concepts of trustworthiness.[23] To  
4  
5 validate the findings investigator triangulation was used. Transcripts were read and reread by  
6  
7 all researchers to gain a sense of content, sometimes returning to interview recordings to  
8  
9 become completely familiar with the data and comprehend its essential features. With the aim  
10  
11 of the study in mind researchers read the text and made notes and headings in the margins to  
12  
13 include all aspects of the content. The first author (KS) established categories based on  
14  
15 citations. To ensure conformability, co-authors discussed the categories, and changes were  
16  
17 made until consensus was reached. To increase credibility according to Krueger and  
18  
19 Casey,[20] at least three focus group interviews should be carried out. In this study, five focus  
20  
21 groups were conducted. A careful description of the sampling procedure and data analyses  
22  
23 was presented to ensure dependability. Each citation was given a number for data-reporting  
24  
25 purposes to show evidence of reporting across responses from the five teams (I–V).  
26  
27  
28  
29  
30

### 31 **Ethical considerations**

32  
33 All members of the GTT teams gave their individual informed consent to participate in the  
34  
35 study. Ethical permission was obtained from the Regional Ethical Board of Linköping  
36  
37 University, Sweden (study number 2010/399-32).  
38  
39  
40  
41  
42  
43  
44  
45  
46  
47  
48  
49  
50  
51  
52  
53  
54  
55  
56  
57  
58  
59  
60

## RESULTS

The categories identified were; *“Usefulness of the GTT”*, *“Application of the GTT”*, *“Triggers”*, *“Preventability of harm”*, *“Team design”*, *“Team tasks”*, *“Team members’ knowledge development ”* and *“Documentation”*. Each category is presented by its strengths and weaknesses.

### *Usefulness of the GTT*

#### **Strengths**

Team members found the method useful in identifying patient harm. An advantage was that the method, apart from being used in a random selection of records, could also be used by specific specialties, or for a subgroup of patients, i.e. for deceased patients.

*“It is a useful tool; it is relevant and it identifies harm. I feel that it is important. It feels that the tool can positively affect healthcare...” (II).*

#### **Weaknesses**

Even if all teams considered the method useful, they also mentioned that it was oriented mainly towards harm connected to actions undertaken by physicians. A nursing care perspective was missing and was requested.

*“One wishes it (the GTT) was more care oriented...lack of care can also harm patients” (IV).*

All teams talked about the method’s weakness in not capturing all failures, as omission is not part of the GTT.

*“There is no trigger for omission. When reading notes, one sometimes wonders why no one has reacted” (V).*

### *Application of the GTT*

#### **Strengths**

1  
2  
3 Most often RNs could easily make their assessments within 20 minutes, pointing out the time  
4  
5 limit as a strong point of the method.  
6

7 *“You quickly find what you need when you have figured out how to review” (I).*  
8

9 While some RNs felt it better to review medical records outside their specialties, others found  
10  
11 it easier to examine records from their own speciality.  
12

13 *“It is easier to understand why certain things were done when you review your own area”*  
14  
15 *(IV).*  
16

### 17 **Weaknesses**

18  
19 The teams gave careful reports on how they previously performed audits, and all mentioned  
20  
21 that they used the method as described in the handbook. Still, all teams made changes in the  
22  
23 review process. For example, in the manual it states that the two RNs in the team should  
24  
25 review the same records separately and then reach a consensus. Instead, all RNs reported  
26  
27 dividing the charts into two sets and reading them separately.  
28  
29

30  
31 *“It is good to sit together and talk, but we no longer review the same records” (V).*  
32  
33

34 The RNs sometimes thought it hard to restrict themselves to looking only for triggers and  
35  
36 associated possible harm as indicated in the chart, when they found other striking things in  
37  
38 patient records. This led them to use the method for purposes other than those originally  
39  
40 intended. In such cases they chose to mark these findings on the GTT chart and discuss them  
41  
42 with the team.  
43

44  
45 *“When I find things that make me react I include them. They may be important in other*  
46  
47 *contexts” (I).*  
48

49 Even if the time limit was not considered a major problem, there were still situations when the  
50  
51 time limit was a problem, e.g. where patients had experienced a long period of care. RNs  
52  
53 mentioned that in some cases the time limit was exceeded.  
54

55  
56 *“We read the records very carefully; and 20 minutes was in no way enough!” (IV).*  
57  
58  
59  
60

1  
2  
3 When reviewing records from their own area there was a risk for the RNs becoming  
4  
5 insensible, regarding patient harm as something that just happens.  
6

7 *“You are more forgiving in your own area, you become blind. Therefore, it is good that*  
8  
9 *reviewers are from different clinics” (III).*  
10

### 11 12 13 14 **Triggers**

#### 15 16 **Strengths**

17  
18 The teams found the triggers’ intuitive in a sense that they were easy to keep in mind covering  
19  
20 wide areas and facilitating reviewing.  
21

22 *“The triggers are good and useful” (I).*  
23

#### 24 25 **Weaknesses**

26  
27 Even if all teams were satisfied with the GTT method, they found that some triggers were  
28  
29 imprecise, and some never used.  
30

31 *“The trigger “treatment” is vague and can always or never be used” (II).*  
32

33  
34 The team members’ affiliations influenced to some extent their statements about a need for  
35  
36 additional triggers. All teams mentioned that a trigger for “failure or measures not been  
37  
38 performed as intended” was missing. The teams also said that several nursing care triggers  
39  
40 were missing and should be added.  
41

42  
43 *“Triggers evaluating harm in the areas of nutrition, elimination, pain and oral hygiene are*  
44  
45 *all missing” (IV).*  
46

47 One team mentioned that bad behaviour by health care providers was not brought up.

48  
49 *“The method is not designed for assessing personnel behaviour from a patient perspective”*  
50  
51 *(I).*  
52

### 53 54 55 56 **Preventability of harm** 57 58 59 60

**Strengths**

The teams mentioned that development of health care processes and the work of patient safety required new thinking and that the, for Swedish conditions added “judgment of preventability”, helped them in achieving this view. The question “Could this have been done differently?” in the sentence “Could we have prevented this from happening?” provided an opportunity to consider preventability from more than one perspective.

*“To gain improvement you must consider many findings as avoidable. It may be avoidable if things are done differently” (III).*

**Weaknesses**

When “judgment of preventability” came up for discussion, all teams considered the concept as too subjective. They felt there would be as many answers as the number of people asked.

*“Determining harm to the patient is easy but the judgment of preventability is difficult” (I).*

**Team composition****Strengths**

The teams found strength in their interdisciplinary representation of healthcare specialities. Several personnel categories to consider patient care from different perspectives were considered a prerequisite for the implementation of healthcare improvements.

*“To gain good results, everyone’s efforts are necessary and important; we see things differently” (II).*

**Weaknesses**

A sufficient number of reviewers were considered important for avoiding problems in the event of reviewers dropping out. Too few reviewers led to team vulnerability due to the risk of team members being unavailable.

*“At least four reviewers are required” (I).*



1  
2  
3 It was also important for team members to continue reviewing for long periods of time.

4  
5 *“You probably need, in any case, at least some years’ of experience of reviewing” (IV).*

6  
7 However, the team also saw a danger in remaining too long as a reviewer, due to possible  
8  
9 increasing tolerance toward AEs or substandard care.

10  
11 *“What I’m wondering about is that there is a risk of becoming less careful, to put things aside*  
12  
13 *thinking that this is nothing” (II).*

### 14 15 16 17 18 **Tasks**

### 19 20 21 **Strengths**

22  
23 The interdisciplinary composition of the teams made it easier to take up reviewed events for  
24  
25 discussion, not only within the team but also with others. Physicians discussed with other  
26  
27 physicians, while RNs discussed with colleagues from their own departments.

28  
29 *”After reviewing I discussed findings with my colleagues” (IV).*

### 30 31 32 **Weaknesses**

33  
34 Teams sought intensified discussions to increase the work of quality improvement of patient  
35  
36 safety. They perceived their most important task was to convey results back to their clinics.

37  
38 This was difficult when randomly reviewing records from an entire hospital.

39  
40 *“Our ambition is to go to the different clinics and tell them directly of our concerns for their*  
41  
42 *specific problems” (I).*

43  
44 Even if the teams would have liked to provide feedback to the clinics, they were concerned  
45  
46 about how their findings would be received.

47  
48 *“We do not want them to look at us as police officers, but wish to review and return to the*  
49  
50 *clinics with our findings with the aim of improving things” (I).*

### 51 52 53 54 55 56 **Team member’s knowledge development**

### Strengths

All teams had used the GTT on a monthly basis from three to five years for their hospital's patient safety work and were accustomed to reviewing patient records from the perspective of various medical specialities. Team members believed they had developed their skills gradually. They had also gained a greater understanding of the health care system during their time on the GTT team. They had increased their skills of how to and how not to document through the reading of patient records.

*"You learn a lot by reading others' notes on how to better carry out documentation" (IV).*

They also mentioned they could better observe care and harm from the patient's perspective.

*"It (GTT) requires time to be able to say that from the patient's perspective harm has occurred" (II).*

### Documentation

#### Strengths

The teams considered RNs' more accurate and precise in their documentation than physicians; and it was the RNs' notes that revealed the greatest number of AEs and helped the most to determine levels of harm. Nursing care documentation was richer in its comments about the patients' conditions during hospital stay.

*"RNs' notes are much more detailed, concerning, for example, urinary infections and how the patient really feels" (V).*

#### Weaknesses

Although the teams felt they had identified patient harm through the RNs' documentation, they considered documentation generally poor. They described sparse and duplicated documentation. The teams mentioned that minor incidents during hospital stay, causing minor patient harm, were not mentioned at all in the discharge letter.

1  
2  
3 *“There is a considerable amount of duplicated documentation” (I).*

4  
5 *“Medical records summaries are often written after the care episode and are very sparse,*  
6  
7 *small incidents aren’t mentioned at all” (V).*

8  
9  
10 The teams felt they had to look through a large body of text that sometimes made it difficult  
11  
12 to orient themselves in the patients’ medical records. They also felt that some of the notes had  
13  
14 no real impact on patient care, which influenced their overview of the patients’ medical  
15  
16 records. Sometimes it was hard for team members to understand how patient care had actually  
17  
18 been conducted, making review more difficult.

19  
20  
21 *“There is so much text that it becomes unmanageable, you get no clear picture of the patient’s*  
22  
23 *condition” (III).*

24  
25 *“One sometimes wonders how care has been carried out” (I).*

## 26 27 28 29 **DISCUSSION**

30  
31 To the best of our knowledge, this study is the first investigation of how the GTT method is  
32  
33 experienced and implemented from the reviewing team’s perspective. The teams found the  
34  
35 GTT method useful whereby it identified patient harm and could be used for different  
36  
37 specialties. They had gradually modified the original review method to suit a personal  
38  
39 context, e.g. time dedicated for reviewing. The method was found subjective in its estimation  
40  
41 of the, for Swedish conditions, added judgment of preventability. A nursing care perspective  
42  
43 was missed and should be added, and insufficient documentation was a barrier to medical  
44  
45 patient record reviewing.

46  
47  
48  
49  
50  
51 The teams made small and gradual changes in the methodology, which may have contributed  
52  
53 to large differences in the assessments over time. They mentioned having used the method as  
54  
55 described in the Swedish manual,[9], based on the original IHI method.[6] However,  
56  
57  
58  
59  
60

1  
2  
3 interviews revealed how teams had deviate from the original method by using it somewhat  
4 differently, occasionally even for other purposes. For example, the RNs did not review the  
5 same charts and reach a consensus about their findings as intended in the manual. Instead,  
6 they divided the charts into two parts and reviewed half of them each. Some teams, besides  
7 random admissions, also reviewed the records of all hospital deaths. Another example was  
8 how one team sometimes interpreted the presence of triggers as equal to the occurrence of  
9 harm. From their point of view the triggers indicated substandard care. If treatment had been  
10 given according to standard, the patient would not have needed e.g. to be readmitted within 30  
11 days. All teams missed a trigger for “measures not performed according to standard care”,  
12 indicating that the teams could have mixed quality measures and harm to patients. Another  
13 possibility is that the teams have had The Swedish National Board of Health and Welfare’s  
14 definition of AEs in their mind instead of the definition of harm from the GTT manual,  
15 restricting harm to physical injuries. By the Swedish National Board of Health and Welfare  
16 harm is defined as: “Any suffering, discomfort, bodily or mental injury, illness or death  
17 caused by healthcare and which is not an inevitable consequence of the patient's condition or  
18 an expected effect of the treatment received by the patient because of her/his condition.[24]  
19  
20  
21  
22  
23  
24  
25  
26  
27  
28  
29  
30  
31  
32  
33  
34  
35  
36  
37  
38  
39  
40

41 The teams had also made another deviation from the original method; the time limit of 20  
42 minutes was sometimes exceeded, as the records were read carefully when the RNs did not  
43 always restrict themselves to look for triggers alone. A recent Danish study showed that the  
44 method was initially interpreted differently at different hospitals.[25] Small changes in  
45 methodology and a gradual development of skills could explain inter-rater disagreement  
46 between teams. Another reason for disagreement between teams could be the teams obtaining  
47 of a patient perspective along with different team composition regarding interdisciplinary  
48 representation. However, it is important to remember that several studies have shown the  
49  
50  
51  
52  
53  
54  
55  
56  
57  
58  
59  
60

1  
2  
3 superiority of record reviews in detecting and categorising AEs.[1,7,8,26-29] This was also  
4  
5 the team members' view, considering that the most important function of the GTT method  
6  
7 was the identification of AEs. In line with Brandrud,[30] they developed new knowledge that  
8  
9 appeared to be useful locally.  
10

11  
12  
13  
14 Even if it was also considered important to provide feedback from GTT reviews to RNs and  
15  
16 physicians on the wards, no team wanted to be regarded as controllers. They would rather  
17  
18 look at harm on a systematic level as did Resar,[31] who mentioned that focus on AEs targets  
19  
20 the system rather than the individual, and can lead to the exploration of methodology to  
21  
22 improve or enhance clinical outcomes. The advantages of the GTT method were that it could  
23  
24 be adapted to specialties, subgroups of patients or health care processes. Safety problems can  
25  
26 be identified by medical record review leading to specific measures to prevent future harm.  
27  
28  
29

30  
31  
32 The teams had views concerning triggers that should be added or removed. They mentioned  
33  
34 that the method included triggers never used, and those that could be used at all times, without  
35  
36 necessarily identifying AEs. The teams missed nursing care triggers, such as patient pain,  
37  
38 nutrition and elimination. They also saw a need for clinic-specific triggers. There are activity-  
39  
40 specific trigger versions for ambulatory care,[32] intensive care,[31] surgical care,[33]  
41  
42 neonatal care[29] and primary care[26]. Creating new triggers requires reflection. We agree  
43  
44 with Kaafarani,[32] on the importance of considering clinical relevance, utility and feasibility  
45  
46 of implementation when designing triggers.  
47  
48  
49

50  
51  
52 The teams found remarkably insufficient documentation and mentioned this as a potential  
53  
54 problem for becoming more proactive in patient safety work. As the GTT method is based  
55  
56 solely on findings in patient records the teams highlighted the lack of documentation, which  
57  
58  
59  
60

1  
2  
3 casted doubt on how care had been conducted. This is in line with other studies.[34-36]  
4  
5 Weingart,[36] mentioned that many AEs are not recorded in the medical charts, attributable to  
6  
7 variable standards of documentation, clinical unawareness or oversight, and concern about  
8  
9 liability exposure. In our study team members mentioned finding it difficult to gain an  
10  
11 overview of the patient's illness. The same result has been shown by Stevenson and  
12  
13 Nilsson.[35] They found that essential information such as vital signs was difficult to enter  
14  
15 and locate in electronic records. It was also unclear where specific information such as blood  
16  
17 pressure and pulse should be documented.  
18  
19

20  
21  
22  
23 The team members gained greater understanding of the structure of healthcare, and also  
24  
25 looked upon AEs more from a patient perspective. The team's belief that their most important  
26  
27 task was to bring back results to the clinics can point at an unclear structure for the team's  
28  
29 task. It is of importance to have a clear structure for the patient safety work at the hospital  
30  
31 level including clarity for the teams, putting their work into the right perspective e.g. that  
32  
33 increased patient safety work is a lengthy process.  
34  
35

36  
37  
38 Being a GTT team member allows the participant new possibilities for collaboration, and a  
39  
40 better chance to be included in a patient safety context with accountability for tracking and  
41  
42 making changes in healthcare. This is in accordance with Brandrud,[30] who found three  
43  
44 success factors for continuous quality improvement; continuous and reliable information,  
45  
46 involvement by all, and an infrastructure based on improvements in knowledge.  
47  
48  
49

50  
51  
52 Focus group interviews were chosen as they encourage interaction between participants. The  
53  
54 team members in our study had worked together as teams for several years. Since we wanted  
55  
56 to achieve a picture of positive and negative experiences of working with the GTT in clinical  
57  
58  
59  
60

1  
2  
3 practice, we tried to create an interview situation as comfortable as possible for the team  
4  
5 members. For this reason, we chose to keep the teams in their initial compositions in the focus  
6  
7 groups.  
8  
9

10  
11 One limit may be that this study was carried out in Sweden where preventability has been  
12  
13 added to the GTT method. Judgment about this was considered as subjective by the teams.  
14  
15 However, apart from the addition of preventability, the Swedish GTT method does not differ  
16  
17 from the original GTT method used in many other countries. The analysis is based on  
18  
19 propositions from the teams, but we do not know how well they reflect other teams' opinions  
20  
21 from other hospitals or under other circumstances. Other GTT teams will probably have  
22  
23 similar experiences and be able to refer to these interpretations, and hopefully develop their  
24  
25 work of patient safety. Further limitations are that our study lacks questions related to how the  
26  
27 core measurements of the GTT protocol, e.g. number of AEs per 100 admissions were  
28  
29 analyzed and presented and in addition we did not pick up the aspect with statistical process  
30  
31 control in the interviews.  
32  
33  
34  
35  
36  
37

### 38 **Conclusions**

39  
40 The GTT method was found useful and important with triggers facilitating reviewing,  
41  
42 although documentation was generally poor. The most important and difficult task as a review  
43  
44 team was to report AEs to the involved clinics. The teams gradually made small changes in  
45  
46 the methodology, which together with gradual expertise and different team composition may  
47  
48 contribute to differences between teams in the assessments over time. Despite this, we  
49  
50 conclude that the GTT method has the strength to identify AEs and could be used in  
51  
52 subgroups of patients or in different specialties.  
53  
54  
55  
56  
57  
58  
59  
60

## Acknowledgements

The authors wish to thank the teams for their efforts.

## Funding statement

This work was supported by FORSS – the research council of southeast Sweden and the County Council of Kalmar for KS. FORSS has neither been involved in any part of the study, nor in writing the manuscript or in the decision to submit the manuscript for publication.

## Competing interest

None of the authors have competing interests.

## Contributors

Kristina Schildmeijer's responsibility; study design, acquisition of data, analysis, interpretation of data, drafting the article and intellectual content.

Lena Nilsson's responsibility; study design, analysis, interpretation of data, drafting the article and intellectual content.

Kristofer Årestedt's responsibility; study design, analysis, interpretation of data, drafting the article and intellectual content.

Joep Perk's responsibility; study design, and intellectual content.

Gunilla Nilsson's responsibility; study design, acquisition of data, analysis, interpretation of data, drafting the article and intellectual content.



**REFERENCES**

1. Landrigan C, Parry G, Bones C, et al. Temporal trends in rates of patient harm resulting from medical care. *N Eng J Med*. 2010;**363**(22):2124-34.
2. Schioler T, Lipczak H, Pedersen BL, et al. Incidence of adverse events in hospitals. A retrospective study of medical records. *Ugeskr Laeger*. 2001;**163**(39):5370-8.
3. Soop M, Fryksmark U, Koster M, et al. The incidence of adverse events in Swedish hospitals: a retrospective medical record review study. *Int J Qual Health Care*. 2009;**21**(4):285-91.
4. Vincent C, Neale G, Woloshynowych M. Adverse events in British hospitals: preliminary retrospective record review. *BMJ*. 2001;**322**(7285):517-9.
5. Wilson R, Runciman W, Gibberd R, et al. The quality in Australian health care study. *Med J Aust*. 1995;**163**(9):458-71.
6. Griffin F, Resar R. IHI Global Trigger Tool for measuring adverse events. (Second Ed). Cambridge, Massachusetts: Institute for Healthcare Improvement, 2009.
7. Classen D, Resar R, Griffin F, et al. "Global Trigger Tool" shows that adverse events in hospitals may be ten times greater than previously measured. *Health Affairs*. 2011;**30**(4):581-9.
8. Good V, Saldana M, Gilder R, et al. Large-scale deployment of the Global Trigger Tool across a large hospital system: refinements for the characterisation of adverse events to support patient safety learning opportunities. *Qual Saf Health Care*. 2011;**20**(1):25-30.
9. Institute for Healthcare Improvement. Structured record review to identify and measure the incidence of injuries in health care by the method described Global Trigger Tool: Guide to patient safety work [Swe: Strukturerad journalgranskning för att identifiera och mäta förekomst av skador i vården enligt metoden Global Trigger Tool : Handbok för patientsäkerhetsarbete]. Institute for Healthcare Improvement Innovation 2007 (A Swedish translated and adjusted version 2008). Stockholm: Kommentus; 2008.
10. The Danish safer hospital programme. (Second Ed). Safety DsfP; 2012. <http://www.sikkerpatient.dk/in-english/the-danish-safer-hospital-programme.aspx> (accessed 18 June 2013).
11. Canadian Patient Safety Institute; 2012. <http://www.patientsafetyinstitute.ca/English/Pages/default.aspx> (accessed 18 June 2013).
12. NMOH. In safe hands. Norwegian Knowledge Centre for the Health Services; 2012. <http://www.pasientsikkerhetskampanjen.no/no/I+trygge+hender/In+English/In+Safe+Hands%3A+the+Norwegian+patient+safety+campaign+2011+-+2013.451.cms> (accessed 18 June 2013).
13. Patient safety first. (Second Ed). Agency NPS; 2012.

1  
2  
3 <http://www.patientsafetyfirst.nhs.uk/Content.aspx?path=/About-the-campaign/> (accessed 18  
4 June 2013).

5  
6 14. Naessens JM, Campbell C, Huddleston J, et al. A comparison of hospital adverse events  
7 identified by three widely used detection methods. *Int J Qual Health Care*. 2009;**21**(4):301-7.

8  
9 15. Forster AJ, O'Rourke K, Shojania KG, et al. Combining ratings from multiple physician  
10 reviewers helped to overcome the uncertainty associated with adverse event classification. *J*  
11 *Clin Epidemiol*. 2007;**60**(9):892-901.

12  
13 16. Hofer TP, Bernstein SJ, DeMonner S, et al. Discussion between reviewers does not  
14 improve reliability of peer review of hospital quality. *Med Care*. 2000;**38**(2):152-61.

15  
16 17. Mattsson T, Lehmann Knudsen J, et al. Assessment of the global trigger tool to measure,  
17 monitor and evaluate patient safety in cancer patients: reliability concerns are raised. *Qual Saf*  
18 *Health Care*. 2013;**0**:1-9.

19  
20 18. Schildmeijer K, Nilsson L, Arestedt K, et al. Assessment of adverse events in medical  
21 care: lack of consistency between experienced teams using the Global Trigger Tool. *BMJ*  
22 *Qual Saf*. 2012;**21**(4):307-14.

23  
24 19. Sharek PJ, Parry G, Goldmann D, et al. Performance characteristics of a methodology to  
25 quantify adverse events over time in hospitalized patients. *Health Serv Res*. 2011;**46**(2):654-  
26 78.

27  
28 20. Krueger RA, Casey MA. *Focus Groups - A Practical Guide for Applied Research*. (Fourth  
29 Ed). Washington: SAGE; 2009.

30  
31 21. Classen DC, Lloyd RC, Provost L, et al. Development and Evaluation of the Institute for  
32 Healthcare Improvement Global Trigger Tool. *J Patient Saf*. 2008;**4**(3):169.

33  
34 22. Resar R, Rozich J, Classen D. Methodology and rationale for the measurement of harm  
35 with trigger tools. *Qual Saf Health Care*. 2003;**12**(Suppl 2):39-45.

36  
37 23. Patton MQ. *Qualitative Research & Evaluation Methods* (Third Ed). Washington: SAGE  
38 Publications Inc.; 2001.

39  
40 24. National Board of Health and Welfare. *Patient Safety and Patient Safety Improvement. An*  
41 *Overview [Patientsäkerhet och patientsäkerhetsarbete. En översikt]*. Stockholm: National  
42 Board of Health and Welfare. 2004.

43  
44 25. von Plessen C, Kodal A, Anhoj J. Experiences with global trigger tool reviews in five  
45 Danish hospitals: an implementation study. *BMJ Open*. 2012;**2**:1-8.

46  
47 26. de Wet C, Bowie P. The preliminary development and testing of a global trigger tool to  
48 detect error and patient harm in primary-care records. *Postgrad Med J*. 2009;**85**:176-80.

49  
50 27. Nilsson L, Pihl A, Tagsjo M, et al. Adverse events are common on the intensive care unit:  
51 results from a structured record review. *Acta Anaesthesiol Scand*. 2012;**56**(8):959-65.

- 1  
2  
3 28. Rozich JD, Haraden CR, Resar RK. Adverse drug event trigger tool: a practical  
4 methodology for measuring medication related harm. *Qual Saf Health Care*. 2003;**12**(3):194-  
5 200.  
6  
7 29. Sharek P, Horbar J, Mason W, et al. Adverse events in the neonatal intensive care unit:  
8 development, testing, and findings of an NICU-focused trigger tool to identify harm in North  
9 American NICUs. *Pediatrics*. 2006;**118**(4):1332-40.  
10  
11 30. Brandrud A, Schreiner A, Hjortdahl P, et al. Three success factors for continual  
12 improvement in healthcare: an analysis of the reports of improvement team members. *BMJ*  
13 *Qual Saf*. 2011;**20**(3):251-9.  
14  
15 31. Resar R, Rozich J, Simmonds T, et al. A trigger tool to identify adverse events in the  
16 intensive care unit. *Jt Comm J Qual Patient Saf*. 2006;**32**(10):585-90.  
17  
18 32. Kaafarani H, Rosen A, Nebeker J, et al. Development of trigger tools for surveillance of  
19 adverse events in ambulatory surgery. *Qual Saf Health Care*. 2010;**19**(5):425-9.  
20  
21 33. Griffin FA, Classen DC. Detection of adverse events in surgical patients using the Trigger  
22 Tool approach. *Qual Saf Health Care*. 2008;**17**(4):253-8.  
23  
24 34. Cheevakasemsook A, Chapman Y, Francis K, et al. The study of nursing documentation  
25 complexities. *Int J Nurs Pract*. 2006;**12**(6):366-74.  
26  
27 35. Stevenson J, Nilsson G. Nurses' perceptions of an electronic patient record from a patient  
28 safety perspective: a qualitative study. *J Adv Nurs*. 2012;**68**(3):667-76.  
29  
30 36. Weingart S, Pagovich O, Sands D, et al. What can hospitalized patients tell us about  
31 adverse events? Learning from patient-reported incidents. *J Gen Intern Med*. 2005;**20**(9):830-  
32 6.  
33  
34  
35  
36  
37  
38  
39  
40  
41  
42  
43  
44  
45  
46  
47  
48  
49  
50  
51  
52  
53  
54  
55  
56  
57  
58  
59  
60
